**Fungicide resistance characterised across seven modes of action in *Botrytis cinerea*  
isolated from Australian vineyards**

**Running title: Resistance to multiple fungicides in *Botrytis cinerea***

Lincoln A. Harper<sup>a</sup>, Scott Paton<sup>bc</sup>, Barbara Hall<sup>d</sup>, Suzanne McKay<sup>d</sup>, Richard P. Oliver<sup>e</sup> and Francisco J.  
Lopez-Ruiz<sup>a\*</sup>

<sup>a</sup> Centre for Crop and Disease Management, School of Molecular and Life Sciences, Curtin University,  
Bentley 6102, Western Australia, Australia

<sup>b</sup> Previous address: Nufarm, Kwinana Beach 6167, Western Australia, Australia.

<sup>c</sup> Current Address: Nutrien Ag Solutions, North Fremantle 6159, Western Australia

<sup>d</sup> South Australian Research and Development Institute, Plant Health and Biosecurity, Urrbrae 5064,  
South Australia, Australia

<sup>e</sup> School of Molecular and Life Sciences, Curtin University, Bentley 6102, Western Australia, Australia

**\*Corresponding author: FLR, [fran.lopezruiz@curtin.edu.au](mailto:fran.lopezruiz@curtin.edu.au)**

## Abstract

**BACKGROUND:** Botrytis bunch rot, caused by *Botrytis cinerea*, is an economically important disease of grapes in Australia and across grape growing regions worldwide. Control of this disease relies on canopy management and the application of fungicides. Fungicide application can lead to the selection of resistant *B. cinerea* populations, which has an adverse effect on management of the disease. Characterising the distribution and severity of resistant *B. cinerea* populations is needed to inform resistance management strategies.

**RESULTS:** In this study, 725 isolates were sampled from 75 Australian vineyards during 2013 – 2016 and were screened against seven fungicides with different modes of action (MOAs). The resistance frequencies for azoxystrobin, boscalid, fenhexamid, fludioxonil, iprodione, pyrimethanil and tebuconazole were 5, 2.8, 2.1, 6.2, 11.6, 7.7 and 2.9% respectively. Nearly half of the resistant isolates (43.8%) were resistant to more than one of the fungicides tested. The frequency of vineyards with at least one isolate simultaneously resistant to 1, 2, 3, 4 or 5 fungicides was 19.5, 7.8, 6.5, 10.4 and 2.6%. Resistance was associated with previously published genotypes in *CytB* (G143A), *SdhB* (H272R/Y), *Erg27* (F412S), *Mrr1* (D354Y), *Bos1* (I365S, N373S + Q369P, I365S + D757N) and *Pos5* (V273I, P319A, L412F/V). Novel genotypes were also described in *Mrr1* (S611N, D616G) *Pos5* (V273L) and *Cyp51* (P347S). Expression analysis was used to characterise fludioxonil resistant isolates exhibiting overexpression (6.3-9.6-fold) of the ABC transporter gene *AtrB* (MDR1 phenotype).

**CONCLUSION:** Resistance frequencies were lower when compared to most previously published surveys of *B. cinerea* resistance in grape and other crops. Nevertheless, continued monitoring of critical MOAs used in Australian vineyards is recommended.

## Key words

*Botrytis cinerea*, fungicide resistance, mutation, grape

## 1 Introduction

*Botrytis cinerea* Pers.:Fr., anamorph *Botryotinia fuckeliana* (De Bary) Whetzel, is a necrotrophic fungal pathogen with a broad host range. *B. cinerea* has been stated as only second to *Magnaporthe oryzae* (rice blast disease) in terms of its scientific and economic importance.<sup>1</sup> There is currently a lack of scientific literature on the scale of crop losses caused by *B. cinerea*.<sup>2</sup> *B. cinerea* is responsible for one of the most economically important diseases of grapevines worldwide. In Australia, *B. cinerea* is considered to be second only to powdery mildew in economic impact in grapes.<sup>3</sup> *B. cinerea* infections, and to a lesser extent other bunch rots, impact all Australian grape growing regions and cost the grape and wine industry an average of \$AUD50 M per annum.<sup>3, 4</sup> Yield losses in Australia from *B. cinerea* and other bunch rots can be anywhere between 3 – 30 % depending on the climatic zone.<sup>3</sup> *Botrytis* infection can also affect grape quality.<sup>5</sup> The control of *B. cinerea* in vineyards relies heavily on the application of fungicides.<sup>6</sup> In Australia, a wide range of both multi-site and single-site fungicides are registered for *B. cinerea* control. (Australian Pesticides and Veterinary Medicines Authority).

*B. cinerea* is a “high risk” pathogen for fungicide resistance development due to its short life cycle and high reproductive rate.<sup>7, 8</sup> Resistance in *B. cinerea* has been linked to target site modifications, target site overexpression, efflux pump activation and detoxification. Resistance to

single site fungicides was first reported in Germany in the 1970s after heavy use of dicarboximides (DCs) and benzimidazoles.<sup>9</sup> To date, populations of *B. cinerea* from grapes resistant to the single site MOA anilinopyrimidines (APs), DCs, hydroxyanilides, phenylpyrroles (PPs), succinate dehydrogenase inhibitors (SDHIs and quinone outside inhibitor (QoI) classes, have been found in most grape growing countries.<sup>10-20</sup> Resistance to these fungicides has been linked to target site modifications and efflux pump activation. In Australia, *B. cinerea* grapevine isolates resistant to benzimidazoles, DCs and APs have been previously described.<sup>21, 22</sup> Similarly, a preliminary report showed isolates of *B. cinerea* from Australian vegetable crops have shown variable levels of resistance to SDHI, QoI and PP groups.<sup>23</sup>

The multiple drug resistance (MDR) phenotype is characterised by reduced sensitivity to fungicides and test compounds with diverse MOAs. MDR has been found in *B. cinerea* populations from grapevines, vegetables, and soft fruit crops.<sup>24-28</sup> Two mechanisms that cause MDR in *B. cinerea* have been characterised; overexpression of the ABC transporter gene *AtrB* (MDR1 phenotype) and overexpression of the Major Facilitator Superfamily (MFS) transporter gene *MfsM2* (MDR2 phenotype).<sup>29</sup>

Current resistance management strategies for *Botrytis* include limiting fungicide use at the multi-seasonal scale, using mixtures, alternating MOA and the introduction of novel MOAs.<sup>30</sup> For example, for APs and SDHIs, the Fungicide Resistance Action Committee (FRAC) recommends a maximum of three sprays per season. In Australia, a maximum of two single site fungicide sprays are recommended per season ([https://www.awri.com.au/industry\\_support/viticulture/agrochemicals/agrochemical\\_booklet/](https://www.awri.com.au/industry_support/viticulture/agrochemicals/agrochemical_booklet/)). In

Australia, MRLs (maximum residue levels) restrict the use of many fungicides on grapes used for the production of wine export.

The aim of this research was to provide data on fungicide sensitivity levels in *B. cinerea* Australian populations to seven fungicides classes widely used in wine grape production. A nationwide collection of isolates was screened via a combination of high-throughput discriminatory concentration assays and molecular analyses. In addition, the presence of MDR1 was investigated in selected isolates.

## 2 Materials and Methods

### 2.1 Fungal Isolates

During 2013-2016, mono-conidial isolates of *B. cinerea* were derived from infected grape material collected from 74 wine grape and 1 table grape vineyard across Australia (Table S1, Fig. 1 and 3). Sampling covered wine regions in Western Australia (WA), South Australia (SA), Victoria (VIC), New South Wales (NSW), Queensland (QLD) and Tasmania (TAS) (Table S1, Fig. 1). *B. cinerea* was sampled by directly swabbing infected material *in situ* or harvested material in the laboratory, with the swabs then used to inoculate yeast soluble starch medium, with addition of 1.25% w/v agar (YSSA).<sup>31</sup> Isolates were subsequently single spored by using a sterile 25G hypodermic needle to transfer conidia to YSSA and were maintained as mycelial plugs on YSSA at 4 °C.

## **2.2 Establishing baseline EC<sub>50</sub> values for azoxystrobin, boscalid, fenhexamid, iprodione, pyrimethanil and tebuconazole using a microtiter assay**

To establish baseline EC<sub>50</sub> values, 53 isolates of *B. cinerea* sampled during 2013 – 2015 seasons, were randomly selected for testing against technical grade azoxystrobin (Sigma-Aldrich®, U.S.A), boscalid (Sigma-Aldrich®, U.S.A), fenhexamid (Bayer, Germany), iprodione (Sigma-Aldrich®, U.S.A), pyrimethanil (Bayer, Germany) and tebuconazole (Bayer, Germany) within a microtiter assay system (Table S2). Five isolates (Bc-7, Bc-279, Bc-287, Bc-385 and Bc-410) from the subset of 53 isolates, were selected for microtiter testing against fludioxonil (Sigma-Aldrich®, U.S.A). Additional isolates (Bc-247, Bc-296, Bc-298, Bc-398, Bc-403, Bc-477, Bc-618) were also tested against pyrimethanil using the microtiter method.

Induction of sporulation and the harvesting of conidia was carried out as previously described by Harper *et al.*<sup>32</sup> with two modifications. YSS agar (YSSA) was used for culturing instead of potato dextrose agar and the conidial suspension adjusted to 10<sup>5</sup> conidia mL<sup>-1</sup>, instead of 10<sup>7</sup> conidia mL<sup>-1</sup>. The liquid media mixtures used in the microtiter assays were as described by Mair *et al.*,<sup>33</sup> except with the addition of Tween® 20 at a final concentration of 0.05%, and the type of media used depended on the fungicide tested. Sensitivity to azoxystrobin, fenhexamid, fludioxonil, iprodione and tebuconazole was assessed using YSS medium, with the following fungicide concentrations: for azoxystrobin: 0, 0.01, 0.025, 0.05, 0.1, 0.5, 1 and 5 µg mL<sup>-1</sup>, for fenhexamid: 0, 0.025, 0.05, 0.075, 0.1, 0.15, 0.25 and 1 µg mL<sup>-1</sup>, for iprodione: 0, 0.4, 1, 1.5, 2, 3, 5, and 10 µg mL<sup>-1</sup>, for fludioxonil: 0, 0.05, 0.1, 0.3, 0.6, 1, 1.5, 2, 2.5, 3, 5 and 10 µg mL<sup>-1</sup>, and for tebuconazole: 0, 0.2, 0.3, 0.5, 0.75, 1, 2, and 3 µg mL<sup>-1</sup>. Salicylhydroxamic acid (SHAM) (Sigma-Aldrich®, U.S.A) was also included in the media for azoxystrobin testing at a final concentration of 400 µM. Sensitivity to pyrimethanil was assessed

using the amended YSS medium minus the yeast extract, with the following fungicide concentrations: 0, 0.05, 0.1, 0.2, 0.25, 0.3, 0.4 and 1  $\mu\text{g mL}^{-1}$ . Sensitivity to boscalid was assessed using Yeast Bacto Acetate (YBA) medium<sup>34</sup> with the following fungicide concentrations: 0, 0.01, 0.02, 0.03, 0.04, 0.075, and 0.1  $\mu\text{g mL}^{-1}$ . Re-testing of isolates that exhibited a significant reduction in sensitivity was carried out with at least one or more ranges of increased concentrations of fungicides; for azoxystrobin: 0, 0.5, 1, 5, 15, 25, 35 and 50  $\mu\text{g mL}^{-1}$  or 0, 1, 5, 25, 50, 75, 100 and 150  $\mu\text{g mL}^{-1}$ , for boscalid: 0, 0.5, 1, 2, 3, 5, 7 and 10  $\mu\text{g mL}^{-1}$ , for fenhexamid: 0, 5, 10, 20, 30, 50, 75 and 100  $\mu\text{g mL}^{-1}$ , for iprodione: 0, 0.5, 1, 2, 3, 5, 7 and 10  $\mu\text{g mL}^{-1}$  or 0, 1, 2, 3, 5, 6, 8 and 10  $\mu\text{g mL}^{-1}$  or 0, 2, 4, 5, 7, 10, 25 and 50  $\mu\text{g mL}^{-1}$ , for : 0, 0.2, 0.5, 1, 1.5, 3, 5 and 10  $\mu\text{g mL}^{-1}$  or 0, 0.2, 0.5, 1, 3, 5, 10 and 25  $\mu\text{g mL}^{-1}$ , for tebuconazole: 0, 0.25, 0.5, 1, 2, 3, 4 and 5  $\mu\text{g mL}^{-1}$ . The loading of conidia and media, reading of the microtiter plate, and the calculations of  $\text{EC}_{50}$  values was carried out as previously described by Mair *et al.*<sup>33</sup>, except that all plates were incubated for 72 h before reading at 450 nm with the exception of pyrimethanil plates that were read after 96h.  $\text{EC}_{50}$  values were calculated by linear regression of  $\log_{10}$ -transformed percentage inhibitions and fungicide concentrations. Resistance factors (RF) were calculated by dividing the resistant  $\text{EC}_{50}$  value by the mean  $\text{EC}_{50}$  value of the sensitive isolates.

### **2.3 Amplification and sequencing of the target genes; *CytB*, *SdhB*, *Erg27*, *Bos1*, *Mdl1*, *Pos5*, *Cyp51*, and the MDR1-related transcription factor *Mrr1***

To investigate mutations involved in resistance identified in the microtiter screen assays, all isolates that exhibited a significant reduction in sensitivity were genotyped for their respective resistance associated genes. The target genes for azoxystrobin, boscalid, fenhexamid, iprodione, pyrimethanil

and tebuconazole were cytochrome B (*CytB*); succinate dehydrogenase subunit B (*SdhB*) and succinate dehydrogenase subunit B (*SdhD*), 3-keto reductase (*Erg27*); histidine kinase (*Bos1*); mitochondrial ABC transporter (*Mdl1*) and mitochondrial NADH kinase (*Pos5*), and lanosterol 14 alpha-demethylase (*Cyp51*), respectively. Three sensitive strains (Bc-7, Bc-385 and Bc-410; Table S2) were genotyped for all target genes for comparative purposes. Candidate MDR1 isolates (Bc-128, Bc-130, Bc-279, Bc-391) and the comparative isolate Bc-385, were sequenced for the *Mrr1* gene. The promoter for *Cyp51* was also sequenced for isolates exhibiting a reduction in sensitivity to tebuconazole. Additional isolates tested against pyrimethanil using the microtiter method (Bc-247, Bc-296, Bc-298, Bc-398, Bc-403, Bc-477, Bc-618), were genotyped for the *Pos5* gene. DNA was extracted from isolates as previously described by Harper *et al.*<sup>32</sup> The primers used to amplify promoter and gene regions, and their respective annealing temperatures and extension times are shown in Table S3. All PCR reactions were carried out in an Eppendorf thermocycler model 5344. The *CytB* gene was amplified in a 50 µL reaction containing 2 µL of DNA, 10 µL of 5x HF reaction buffer, 0.16 mM of each dNTP, 0.5 µM of each primer and 1U of Phusion® polymerase (New England Biolabs® Inc., U.S.A). The subsequent thermal profile was as follows: initial denaturation was at 98 °C for 30 s followed by 35 cycles at 98 °C for 10 s, 59 °C for 30 s, and 72 °C for 3 min, and a final extension at 72 °C for 3 min. *SdhB*, *Erg27*, *Mrr1*, *Bos1*, *Mdl1*, *Pos5*, *Cyp51*, and the *Cyp51* promoter, were amplified using a MyTaq™ (Bioline, U.K.) reaction mixture and thermal profile as previously described by Harper *et al.*<sup>32</sup>, except with the specific annealing temperatures and extension times as described in Table S3. Amplified gene products were confirmed on a 1% agarose gel and then sent to Macrogen Korea for sequencing. Consensus gene sequences were aligned to the following reference sequences: AB262969 (*CytB*), AY726618 (*SdhB*), GQ253439 (*SdhD*), AY220532 (*Erg27*), *B. cinerea* B05.10 chromosome 5; CP009809 (*Mrr1*), AF435964 (*Bos1*), *B. cinerea* B05.10 chromosome 10;



CP009814 (*Pos5*), *B. cinerea* B05.10 chromosome 16; CP009820 (*Mdl1*), AF279912 (*Cyp51*), *B. cinerea* T4 contig; FQ790352 (*Cyp51* promoter). Alignments were carried out as described by Mair *et al.*<sup>33</sup>. The nucleotide sequences generated in this study have been deposited in GenBank and are listed in Table S4.

#### **2.4 Cleaved amplified polymorphic sequence analysis of *Bos1***

The cleaved amplified polymorphic sequence (CAPS) test utilising the restriction enzyme *Taq I* (New England Biolabs® Inc., U.S.A) to identify the I365N/R/S mutant in *Bos1* was carried out as described by Oshima *et al.*<sup>35</sup> In this study, the internal sequencing primers os1 F and os1 R (Table S3) were used to amplify a 1133 bp fragment encompassing the I365S and Q369P + N373S alleles. The fragment was amplified using the MyTaq protocol described above and with the annealing temperature and extension time described in Table S3. The digestion of the product was carried as per Oshima *et al.*<sup>35</sup> The same amplified fragment was also used to test for the presence of the Q369H/P allele, which required digestion with *Sma I* (New England Biolabs® Inc., U.S.A).

#### **2.5 Development of a fungicide resistance discriminatory concentration agar assay**

Minimum inhibitory concentration (MIC) values identified in the microtiter assay (Table S2) were used to design a discriminatory concentration (DC) agar screen to test the remaining 672 isolates in the collection. The DCs used in the agar assay for azoxystrobin, boscalid, fenhexamid, fludioxonil, iprodione, pyrimethanil and tebuconazole were 5, 1, 1, 0.1, 3, 0.4 and 3  $\mu\text{g mL}^{-1}$ . For all fungicides, the DC screening was carried out using YSS agar, except for boscalid which used YBA agar and

pyrimethanil which used YSSA minus the yeast extract. SHAM was added at a concentration of 400  $\mu\text{M}$  for the plates containing azoxystrobin. Mycelial colonies were grown as described by Harper *et al.*<sup>32</sup>. Two 4 mm agar plugs per isolate were taken from the edge of actively growing colonies and then placed on plates containing the appropriate media and fungicide combination. Eight isolates were tested per plate, and plates were incubated at room temperature in the dark for 3 days and scored based on their ability to grow on each fungicide.

## 2.6 RT-qPCR analysis of *AtrB* and *Cyp51*

To identify MDR1 phenotypes and further characterise isolates lacking mutations in *Cyp51*, the expression levels of *AtrB* and *Cyp51* were assessed, respectively. Isolates Bc-128, Bc-130, Bc-279, Bc-287, Bc-385 and Bc-391 were selected for *AtrB* expression analysis. Bc-130 was selected for *AtrB* analysis to investigate if MDR1 could contribute to a *teb*<sup>LR</sup> phenotype. Bc-287 was selected for *AtrB* expression analysis as it exhibited a group S haplotype (Fig. 8) that has previously been associated with MDR1.<sup>24-26</sup> Isolates were incubated as described by Li *et al.*,<sup>25</sup> with some modifications. Culture growth was carried out in 50 mL of potato dextrose broth (Difco™, U.S.A) in a 250 mL flask. For *AtrB* expression analysis, Bc-279, Bc-287, and Bc-385 were induced with 1  $\mu\text{g mL}^{-1}$  pyrimethanil for 0.5 h. For *Cyp51* expression analysis, Bc-130 and Bc-385 were induced with 0.5  $\mu\text{g mL}^{-1}$  tebuconazole for 1 h. Primers that were used for RT-qPCR analysis are described in Table S3. Harvesting of biomass, extraction of RNA, production of cDNA, and RT-qPCR was carried out as described by Mair *et al.*<sup>33</sup> with *Actin* used as the endogenous control (BC1G\_08198.1).

## 2.7 Statistical analysis

All statistical analyses were conducted in SPSS statistics (IBM, New York, U.S.A.). To account for heteroscedasticity, all fungicide sensitivity data were  $\log_{10}$ -transformed before analysis. To separate  $EC_{50}$  mean values between sensitive and resistant isolates characterised in the 53 isolate microtiter subset, an independent samples t-test ( $P = 0.05$ ) or Mann-Whitney  $U$ -test ( $P = 0.05$ ) was used depending on whether the data set had a normal or non-normal distribution. Mean values for gene expression analyses were analysed using one-way ANOVA, with means separated by independent samples t-test ( $P = 0.05$ )

### 3 Results

#### 3.1 Identification of resistance to multiple fungicide groups in *B. cinerea*

The  $EC_{50}$  ranges for azoxystrobin, boscalid, fenhexamid, fludioxonil, iprodione, pyrimethanil and tebuconazole, were 0.04→50, 0.03–2.90, 0.05–27.33, 0.09 – 0.93, 0.75→50, 0.09–28.71 and 0.21–1.8  $\mu\text{g mL}^{-1}$ , respectively (Tables 1 and S2, Fig. 2). Except for iprodione and tebuconazole, isolates with an  $EC_{50} > 0.5 \mu\text{g mL}^{-1}$  were classified as resistant. For iprodione and tebuconazole, isolates were considered resistant when their  $EC_{50}$  values were higher than 2.5  $\mu\text{g mL}^{-1}$  and 0.75  $\mu\text{g mL}^{-1}$ , respectively (Tables 1 and S2, Fig. 2). Isolates resistant to azoxystrobin, boscalid and fenhexamid were all designated as  $\text{azo}^{\text{R}}$ ,  $\text{bos}^{\text{R}}$  and  $\text{fen}^{\text{R}}$  isolates, respectively (Tables 1 and S2, Fig. 2). Isolates resistant to iprodione, fludioxonil and pyrimethanil were divided into medium resistant ( $\text{ipr}^{\text{MR}}$ ,  $\text{flu}^{\text{MR}}$ ,  $\text{pyr}^{\text{MR}}$ ) or high resistant ( $\text{ipr}^{\text{HR}}$ ,  $\text{pyr}^{\text{HR}}$ ) isolates (Tables 1 and S2, Fig. 2). Tebuconazole resistant isolates were characterised as low resistant ( $\text{teb}^{\text{LR}}$ ) (Tables 1 and S2, Fig. 2).  $EC_{50}$  values for the sensitive and resistant populations for all fungicides were significantly difference from each other ( $P < 0.05$ ; Tables 1 and S2, Fig. 2). The RF ranges of the resistant isolates in the 53 isolate subset ranged from low (2.5

– 4.2) for tebuconazole, medium (4.3 - 58) for boscalid, iprodione and pyrimethanil, and high (>255) for azoxystrobin and fenhexamid (Table 1).

### 3.2 Resistance frequencies for seven MOAs in Australian grape growing regions

A total of 672 isolates collected between 2013 and 2016 from major grape-producing regions of Australia were screened for resistance using a DC agar assay as described above. Combining microtiter and DC agar assay data, the total resistance frequencies ranged from 2.8 to 11.6% (Fig. 3). Thirty different resistance profiles, with 24 of these showing resistance to at least 2 MOA, were identified (Table 2). The total number of resistant isolates for each fungicide in WA, SA, VIC and NSW, ranged from 0 – 30, 3 – 14, 1 – 26 and 0 – 3, respectively (Fig. 4). The frequency of resistant isolates in each of the states was 15.4, 25.3, 61.9, 36.9, and 5.8% across WA, SA, TAS, VIC and NSW, respectively (Table S1). The frequency of vineyards with resistance to 1 – 5 MOA were 19.5, 7.8, 6.5, 10.4 and 2.6%, respectively (Fig. 5). No resistance was found in QLD.

### 3.3 Fungicide resistance is associated with mutations in multiple fungicide target genes

Relevant target site genes were sequenced in all resistant isolates found in the microtiter assay and compared to target gene sequences from the three sensitive reference isolates (Bc-7, Bc-385, Bc-410) (Table S2, Fig. 6). Mutations in archetype species are stated below if the proposed archetype is not *B. cinerea* or if the mutations are not exclusively characterised in *B. cinerea*.<sup>36</sup>

Azo<sup>R</sup> isolates all showed the amino acid sequence change G143A (G143A in the archetype *Zymoseptoria tritici*) (Table 3, Fig. 6). Sequencing of *CytB* from the sensitive isolate Bc-385 revealed

the presence of an intron at the G143 site (Fig. 6). Amplification of *CytB* from Bc-111 revealed the presence of two fragments, indicating the presence of the G143 intron (data not shown). Subsequently, intron specific primers (Table S3) were used to confirm the presence of this intron in Bc-111 (data not shown).

Sequencing of the *SdhB* gene in two *bos*<sup>R</sup> isolates identified in the microtiter analysis showed mutation H272R (*H277Y* in the archetype *Pyrenophora teres f. sp. teres*) (Table 3, Fig. 6). Additional *SdhB* genotyping was carried out on nine boscalid resistant isolates identified in the DC assay (Table 3). Eight of these isolates contained the H272R mutation, while the remaining isolate had the amino acid change H272Y (Table 3, Fig. 6). Sequencing of the *SdhD* gene in two *bos*<sup>R</sup> isolates (Bc-111, Bc-181) and comparative sensitive isolates revealed no non-synonymous changes (data not shown).

A polymorphism in *Erg27* at amino acid position 238 (CCT to TCT) that resulted in a change of a proline to a serine (P238S) was not correlated with fenhexamid resistance (Fig. 6). *Fen*<sup>R</sup> isolates had the amino acid change F412S (Table 3, Fig. 6).

All sensitive and resistant isolates genotyped for *Bos1* had the amino acid change A1259T (Fig. 6). All *ipr*<sup>MR</sup> isolates had the amino acid changes I365S and V1136I (Table 3, Fig. 6). All *ipr*<sup>HR</sup> isolates either contained the amino acid changes Q369P + N373S or I365S + D757N. The I365S + D757N *ipr*<sup>HR</sup> haplotype (Bc-396) had a significantly lower iprodione sensitivity ( $EC_{50}$  value of 25.10  $\mu\text{g mL}^{-1}$ ) when compared to *ipr*<sup>MR</sup> isolates which had the I365S + V1136I haplotype (Bc-39, Bc-128, Bc-179, Bc-343; mean  $EC_{50}$  value of  $8.07 \pm 1.58 \mu\text{g mL}^{-1}$ ) (data not shown) (Table 3 and S2, Fig. 6). Twenty-nine iprodione resistant isolates, identified in the DC assay, were tested using the CAPS method described in Oshima *et al.*<sup>35</sup> (*Taq* I – I365N/R/S) and in this study (*Sma* I – Q369H/P) (Table

3). From this analysis, eighteen and eleven isolates were characterised as I365N/R/S and Q369H/P, respectively (Table 3).

Two putative pyrimethanil target genes were sequenced; *Pos5* and *Mdl1*.<sup>16</sup> Four of the *pyr*<sup>MR</sup> isolates (Bc-39, Bc-128, Bc-177, Bc-279) exhibited no changes in *Pos5* (Table S2, Fig. 6). Three other *pyr*<sup>MR</sup> isolates (Bc-296, Bc-298, Bc-477) showed the amino acid change V273I or V273L (Tables 3 and S2, Fig. 6). All *pyr*<sup>HR</sup> isolates had either P319A, L412F or L412V (Tables 3 and S2, Fig. 6).

With respect to the *Mdl1* gene, all isolates tested showed the amino acid changes S29P and K790R (Fig. 6). One *pyr*<sup>MR</sup> isolate (Bc-177) and two *pyr*<sup>HR</sup> isolates (Bc-287, Bc-289) showed the amino acid change T66A (Fig. 6). One sensitive isolate (Bc-385), one *pyr*<sup>MR</sup> isolate (Bc-177) and two *pyr*<sup>HR</sup> isolates (Bc-297, Bc-289) all showed the amino acid change D780N (Fig. 6).

The *teb*<sup>LR</sup> isolate Bc-475 showed the amino acid change P347S (*K354* in the archetype *Z. tritici*) (Table 3, Fig. 6). No changes in the *Cyp51* gene were found in the other *teb*<sup>LR</sup> isolate Bc-130. Sequencing of a 973 bp region directly upstream of the *Cyp51* start codon in Bc-130, revealed two SNPs (G > A at -365 and A > T at -169) that were not present in the sensitive comparative isolate Bc-385 (data not shown). *Cyp51* expression analysis in Bc-130 revealed small constitutive and inducible over expression values (~1.5-fold), compared to the comparative *teb*<sup>S</sup> isolate Bc-385 ( $P < 0.05$ ; Fig. S2). The amino acid changes V24I and V61I were found in the sensitive strains Bc-385 and Bc-7, respectively (Fig. 6).

#### **3.4 D354Y, S611N and D616G mutations in the transcription factor gene *Mrr1* may contribute to constitutive overexpression of *AtrB* in fludioxonil resistant isolates**

The *AtrB* gene was found to be expressed constitutively at a significantly higher level in fludioxonil resistant isolates Bc-279, Bc-128 and Bc-391 compared to the *flu*<sup>S</sup> isolates Bc-385 and Bc-287 ( $P <$

0.05; Fig. 7). The relative increases in expression were 6.3, 7.3 and 9.6-fold for Bc-279, Bc-128 and Bc-391, respectively (Fig. 7). Bc-130 did not exhibit overexpression of *AtrB* compared to Bc-385 (Fig. 7). Under pyrimethanil treatment, only Bc-279, showed a significantly higher relative expression (5.9-fold) than Bc-385 ( $P < 0.05$ ; Fig. S1). Sequencing of the MDR1-related *Mrr1* gene in the fludioxonil resistant isolates Bc-279, Bc-128, Bc-391 and the fludioxonil sensitive isolates Bc-385, Bc-130 and Bc-287 revealed the presence of several mutations and indels (Table S5, Fig. 8). Of these mutations, V227I + S611N, D616G and  $\Delta 6\text{bp}$  (nt 67–72, or 73–78, or 79–84) + D354Y were only found in Bc-279, Bc-128 and Bc-391, respectively (Table S5, Fig. 8).

## 4 Discussion

Data on fungicide resistance in Australian grapevine *B. cinerea* populations is limited.<sup>21, 22</sup> To provide further data on the fungicide sensitivity status in *B. cinerea* grapevine populations, a nationwide screening study was undertaken.

The resistance frequencies found in this study were generally low (2.1 – 11.6%) and like values previously reported for *B. cinerea* in wine grapes by other authors (Table 4, Fig. 3). Differences in frequencies among reports may be influenced by numerous contributing factors, including phenotyping methods, chemical use patterns across regions and fitness differences between *B. cinerea* strains. This study used microtiter and YSSA based mycelial growth methods to calculate overall frequencies, while previous reports used either microtiter<sup>12, 17, 37</sup> or a non-YSSA based mycelial growth methods (Table 4).<sup>13, 18, 20, 22, 38-40</sup>

Diverse chemical programs across different wine growing countries could potentially promote differences in frequencies between reports. The current recommended limit of two sprays per season per MOA in Australian wine grape production may be playing a role in limiting frequency levels across all single-site fungicides. Leroch *et al.*<sup>12</sup> and Walker *et al.*<sup>14</sup> characterised low iprodione resistance frequencies in *B. cinerea* and suggested that this was the consequence of limited use of these fungicides in German and French vineyards, respectively. In Australia, the relatively recent registration of fenhexamid and boscalid, together with the drastic reduction in use of the latter due to MRL restrictions, could also contribute to maintaining low resistance frequency levels for these fungicides. Conversely, the earlier introduction of pyrimethanil and iprodione could be associated with increased exposure to these chemicals and support the relatively higher resistance frequencies found. The lack of independent selection pressure for fungicides available as mixtures with other MOAs in Australia, e.g. azoxystrobin, tebuconazole and fludioxonil, could also be associated with low resistance frequency levels to these chemicals. The less frequent use of expensive, highly specific botryticides may have an effect on resistance frequencies.

Low resistance frequencies could be the result of the presence of fitness penalties. The presence of fitness costs in fenhexamid and fludioxonil resistant field isolates<sup>27, 41-44</sup> could play a significant role in maintaining low resistance frequencies with respect to these fungicides. Conversely, no significant fitness costs have been reported in iprodione or pyrimethanil resistant isolates, which may support the relatively higher resistance frequency found for these two chemicals.<sup>35, 45-49</sup>

Resistance to multiple MOA (2 – 5) was recorded in 43.7% of the resistant isolates (Table 2). Multi-resistance has been previously reported in several wine grape *B. cinerea* studies.<sup>13, 17, 22, 50, 51</sup>



This phenomenon could be the result of overexposure of *Botrytis* populations to different MOAs in a sequential manner.<sup>52</sup> Applications of a single MOA or mixtures of single-site actives appear to have selected for multi-resistant *B. cinerea* strains in blackberry and strawberry.<sup>52</sup> Resistance to one fungicide in a multi-resistant isolate could be indirectly selected by the application of another fungicide for which resistance already exists, also known as “selection by association” theory.<sup>53, 54</sup> In this report, the characterisation of multi-resistant isolates resistant to boscalid could be an example of this process as recent selection pressure from this fungicide is now essentially non-existent in *B. cinerea* populations. Generally, in Australia MRL restrictions have decreased the number of MOAs rotated within a chemical program, as alternative chemical options are absent.

Resistance identified in this study was in most cases associated with mutations reported elsewhere, with novel genotypes also identified (Fig. 6 and 8). The *CytB* G143A mutation<sup>38</sup> was identified in all azo<sup>R</sup> isolates (Table 3, Fig. 6). An intron found at position 143 in an azo<sup>S</sup> and azo<sup>R</sup> isolates (Fig. 6) had previously been described in sensitive<sup>38, 50, 55, 56</sup> and QoI resistant isolates.<sup>57</sup> The presence of this intron prevents the G143A mutation occurring as splicing will be affected.<sup>38, 56, 58, 59</sup> In our study, the presence of this intron in an isolate (Bc-111) that also contains mutant (G143A) copies of *CytB*, confirms that Australian isolates can be heteroplasmic for the G143 intron. Intron heteroplasmy could suggest the presence of a “fitness balance”, whereby intron and G143A *CytB* copies are balanced to maintain the lowest possible fitness cost.

Mutations H272R/Y, previously found in the gene encoding for the *sdhB* subunit of the SDHI target in highly resistant (RF = 40) *B. cinerea*,<sup>50, 60</sup> were identified in all bos<sup>R</sup> isolates genotyped in this study (Table 3, Fig. 6).

Sequencing of *Erg27* in fen<sup>HR</sup> isolates revealed the presence of the F412S mutation (Table 3, Fig. 6), which had been previously associated with a high level of fenhexamid resistance (RF = >30) in *B. cinerea* isolated from grapes.<sup>31</sup> The P238S mutation identified in fenhexamid sensitive and resistant isolates in this study (Fig. 6), has been found in both sensitive and resistant isolates in a number of grape and non-grape studies, which suggests that P238S may not be associated with resistance.<sup>15, 37, 61-63</sup>

The occurrence of multi-single site resistance phenotypes in a population can disguise the presence of MDR phenotypes. Resistance to fludioxonil, has previously been shown to be associated with overexpression of the ABC transporter gene *AtrB*.<sup>24-26, 29</sup> The presence of MDR1 isolates was confirmed by measuring the expression of the *AtrB* gene in isolates sensitive and resistant to fludioxonil (Fig. 7). Three different *Mrr1* haplotypes were found in MDR1 isolates (Bc-128, Bc-279 and Bc-391) overexpressing *AtrB* (Fig. 7). The *Mrr1* mutation D354Y (Bc-391) was previously described in MDR1 isolates in two strawberry *B. cinerea* studies.<sup>26, 52</sup> The 6bp deletion in Bc-391 *Mrr1* was previously reported in an MDR1 isolate alongside mutation R632I.<sup>24</sup> In addition to D354Y, the novel *Mrr1* mutations S611N and D616G were found in MDR1 isolates Bc-279 and Bc-1128, respectively. Kretschmer *et al.*<sup>29</sup> found the *Mrr1* mutation S611R in MDR1 isolates. It is possible that changes in the vicinity of residue 611 could have a similar effect to that of S611R. Characterisation of additional MDR1 isolates that also exhibit these changes would provide further evidence of the association of these mutations with a MDR1 phenotype. Several group S isolates, that characteristically exhibit 18 and 21 bp insertions in *Mrr1*, have previously been associated with MDR1.<sup>24, 26, 52</sup> The teb<sup>LR</sup> isolate Bc-130 lacked a MDR1 phenotype but exhibited a group S-like *Mrr1* haplotype, with the characteristic 18bp and 21bp INDELS present and absent, respectively (Table S5, Fig. 7 and 8).

Mosbach *et al.*<sup>16</sup> associated mutations in two genes: *Pos5* and *Mdl1*, with AP resistance in grape and strawberry *B. cinerea* field isolates. All pyr<sup>HR</sup> isolates showed either mutation P319A or L412F/V in *Pos5*, which agrees with the findings of Mosbach *et al.*,<sup>16</sup> where RF values of >10 were reported in grape and strawberry *B. cinerea* isolates exhibiting these mutations.<sup>16</sup> Higher EC<sub>50</sub> values were found in L412V mutants than L412F mutants. (Table S2, Fig. 6). Several of the pyr<sup>MR</sup> isolates exhibited V273I/L changes (Bc-296, Bc-298, Bc-477), with the remaining pyr<sup>MR</sup> isolates (Bc-37, Bc-128, Bc-177, Bc-279) showing no changes in *Pos5* (Table S2, Fig. 6). The same authors also identified AP-resistant field isolates lacking mutations in *Pos5* or *Mdl1*. Mosbach *et al.*<sup>16</sup> characterised the V273I *Pos5* genotype in one AP-resistant grape isolate. Our study is the first report describing the V273L genotype, which was only found in one pyr<sup>MR</sup> isolate (Fig. 6). Further screening is required to estimate the frequency of this novel genotype. A T66A change in the *Mdl1* gene was found in the pyr<sup>MR</sup> in isolate Bc-177. Mosbach *et al.*<sup>16</sup> characterised AP-resistant field isolates that carried T66A in combination with V273I, P319A or L412V changes in *Pos5*. The overexpression of *AtrB* in MDR1 isolates that lack *Pos5* or *Mdl1* mutations (Bc-128, Bc-279) could be contributing to the pyr<sup>MR</sup> phenotype (Fig. 7). Further research is required to identify molecular markers for pyrimethanil resistance in isolates that lack mutations in *Pos5* and *Mdl1*.

The *Bos1* haplotypes I365S + V1136I (ipr<sup>MR</sup>), I365S + D757N (ipr<sup>HR</sup>) and Q369P + N373S (ipr<sup>HR</sup>) identified in this study have been previously associated with medium to high levels of dicarboximide resistance (RF = >3.4) in *B. cinerea* from grape and other host crops.<sup>35, 38, 47, 64, 65</sup>

Mutations in *Cyp51A* or *Cyp51B* are commonly associated with DMI resistance in various fungal species, however, none are yet to be identified in *B. cinerea*.<sup>36</sup> A novel mutation P347S was found in the teb<sup>LR</sup> isolate Bc-475, however further evidence is needed to associate this change to the

teb<sup>LR</sup> phenotype. The teb<sup>LR</sup> isolate Bc-130 exhibited no changes in the *Cyp51* promoter or coding region (data not shown, Fig. 6). Nonetheless, expression analysis of *Cyp51* showed that Bc-130 had a marginal but significantly higher constitutive and inducible expression level of *Cyp51* when compared to the sensitive isolate Bc-385 ( $P < 0.05$ ; Fig. S2). It is not clear whether this small difference in constitutive and inducible expression in *Cyp51* would contribute to the reduction in tebuconazole sensitivity observed in isolate Bc-130.

This study has shown that the majority of single site MOA botryticides registered in Australia for the control of botrytis bunch rot in grapes are compromised to some degree. Resistance factors are very high for some compounds and many isolates were resistant to multiple MOA across all heavily sampled Australian wine-growing regions. However, the frequency of resistance amongst isolates was low. The current recommended resistance management strategy that limits the use of single site fungicides is most likely playing a crucial role in maintaining these low frequencies.

## ACKNOWLEDGEMENTS

The authors would like to thank Steven Chang for isolating a small subset of the *B. cinerea* population, Wesley Mair for designing a selection of the oligonucleotide primers, and all growers and viticulturists who provided *Botrytis* samples. This work was funded by Wine Australia (SAR1204, SAR1701 and SAR1701-1.2) and Curtin University (Perth, Australia).

## References

- 1 Dean R, Van Kan JAL, Pretorius ZA, Hammond-kosack KE, Di Pietro A, Spanu PD, et al., The top 10 fungal pathogens in molecular plant pathology. *Mol Plant Pathol* **13**:414-430 (2012).
- 2 Carisse O, Epidemiology and aerobiology of *Botrytis* spp., in *Botrytis – the Fungus, the Pathogen and its Management in Agricultural Systems*, ed. by Fillinger S and Elad Y. Springer International Publishing, Cham, Switzerland, pp. 127-148 (2016).
- 3 Scholefield P and Morison J. *Assessment of economic cost of endemic pests & diseases on the Australian grape & wine industry*. Grape and Wine Research and Development Corporation, Adelaide, Australia (2010).
- 4 Emmett R and Nair N, *Botrytis* rot of grapes in Australia. *Australas Grapegrow Winemak* **33**:19-21 (1991).
- 5 Ribereau-Gayon J, Ribereau-Gayon P and Seguin G, *Botrytis cinerea* in enology, in *The Biology of Botrytis*. Academic Press, London, pp. 251-274 (1980).
- 6 Elad Y, Vivier M and Fillinger S, *Botrytis*, the good, the bad and the ugly, in *Botrytis – the Fungus, the Pathogen and its Management in Agricultural Systems*, ed. by Fillinger S and Elad Y. Springer International Publishing, Cham, pp. 1-15 (2016).
- 7 Brent KJ and Hollomon DW. *Fungicide resistance: the assessment of the risk*. Global crop protection federation, Belgium (1998).
- 8 Grimmer MK, van den Bosch F, Powers SJ and Paveley ND, Fungicide resistance risk assessment based on traits associated with the rate of pathogen evolution. *Pest Manage Sci* **71**:207-215 (2015).
- 9 Dekker J, Acquired resistance to fungicides. *Annu Rev Phytopathol* **14**:405-428 (1976).
- 10 Leroux P, Chapeland F, Desbrosses D and Gredt M, Patterns of cross-resistance to fungicides in *Botryotinia fuckeliana* (*Botrytis cinerea*) isolates from French vineyards. *Crop Prot* **18**:687-697 (1999).
- 11 Baroffio CA, Siegfried W and Hilber UW, Long-term monitoring for resistance of *Botryotinia fuckeliana* to anilinopyrimidine, phenylpyrrole, and hydroxyanilide fungicides in Switzerland. *Plant Dis* **87**:662-666 (2003).
- 12 Leroch M, Kretschmer M and Hahn M, Fungicide resistance phenotypes of *Botrytis cinerea* isolates from commercial vineyards in south west Germany. *J Phytopathol* **159**:63-65 (2011).
- 13 Latorre BA and Torres R, Prevalence of isolates of *Botrytis cinerea* resistant to multiple fungicides in Chilean vineyards. *Crop Prot* **40**:49-52 (2012).
- 14 Walker A-S, Micoud A, Rémuson F, Grosman J, Gredt M and Leroux P, French vineyards provide information that opens ways for effective resistance management of *Botrytis cinerea* (grey mould). *Pest Manage Sci* **69**:667-678 (2013).
- 15 De Miccolis Angelini RM, Rotolo C, Masiello M, Gerin D, Pollastro S and Faretra F, Occurrence of fungicide resistance in populations of *Botryotinia fuckeliana* (*Botrytis cinerea*) on table grape and strawberry in southern Italy. *Pest Manage Sci* **70**:1785-1796 (2014).
- 16 Mosbach A, Edel D, Farmer AD, Widdison S, Barchietto T, Dietrich RA, et al., Anilinopyrimidine resistance in *Botrytis cinerea* is linked to mitochondrial function. *Front Microbiol* **8** (2017).

- 17 Campia P, Venturini G, Moreno-Sanz P, Casati P and Toffolatti SL, Genetic structure and fungicide sensitivity of *Botrytis cinerea* populations isolated from grapevine in northern Italy. *Plant Pathol* **66**:890-899 (2017).
- 18 Avenot HF, Quattrini J, Puckett R and Michailides TJ, Different levels of resistance to cyprodinil and iprodione and lack of fludioxonil resistance in *Botrytis cinerea* isolates collected from pistachio, grape, and pomegranate fields in California. *Crop Prot* **112**:274-281 (2018).
- 19 Sang C, Ren W, Wang J, Xu H, Zhang Z, Zhou M, et al., Detection and fitness comparison of target-based highly fludioxonil-resistant isolates of *Botrytis cinerea* from strawberry and cucumber in China. *Pestic Biochem Physiol* **147**:110-118 (2018).
- 20 Beresford R, Wright P, Middleditch C, Vergara M, Hasna L, Wood P, et al., Sensitivity of *Botrytis cinerea* to fungicides used in New Zealand wine grape spray programmes. *N Z Plant Prot* **70**:285-294 (2017).
- 21 Nair NG, Borchet E, Villagran K and Spooner-Hart R, Tools for managing *Botrytis* rot of grapes – monitoring incidence of pathogen and fungicide resistance. *Aust Grapegrow Winemak* **405**:51-55 (1997).
- 22 Sergeeva V, Nair NG, Verdane JR, Shen C, Barchia I and Spooner-Hart R, First report of anilinopyrimidine-resistant phenotypes in *Botrytis cinerea* on grapevines in Australia. *Australas Plant Pathol* **31**:299-300 (2002).
- 23 Hailstones D. *Identification and Monitoring of Resistance in Vegetable Crops in Australia*. Horticulture Australia Ltd, Sydney, Australia (2011).
- 24 Leroch M, Plesken C, Weber RWS, Kauff F, Scalliet G and Hahn M, Gray mold populations in German strawberry fields are resistant to multiple fungicides and dominated by a novel clade closely related to *Botrytis cinerea*. *Appl Environ Microbiol* **79**:159-167 (2013).
- 25 Li X, Fernández-Ortuño D, Grabke A and Schnabel G, Resistance to Fludioxonil in *Botrytis cinerea* Isolates from Blackberry and Strawberry. *Phytopathology* **104**:724-732 (2014).
- 26 Fernández-Ortuño D, Grabke A, Li X and Schnabel G, Independent Emergence of Resistance to Seven Chemical Classes of Fungicides in *Botrytis cinerea*. *Phytopathology* **105**:424-432 (2014).
- 27 Ren W, Shao W, Han X, Zhou M and Chen C, Molecular and Biochemical Characterization of Laboratory and Field Mutants of *Botrytis cinerea* Resistant to Fludioxonil. *Plant Dis* **100**:1414-1423 (2016).
- 28 Rupp S, Weber RWS, Rieger D, Detzel P and Hahn M, Spread of *Botrytis cinerea* Strains with Multiple Fungicide Resistance in German Horticulture. *Front Microbiol* **7** (2017).
- 29 Kretschmer M, Leroch M, Mosbach A, Walker A-S, Fillinger S, Mernke D, et al., Fungicide-driven evolution and molecular basis of multidrug resistance in field populations of the grey mould fungus *Botrytis cinerea*. *PLoS Pathog* **5** (2009).
- 30 Fillinger S and Walker A-S, Chemical control and resistance management of *Botrytis* diseases, in *Botrytis – the Fungus, the Pathogen and its Management in Agricultural Systems*, ed. by Fillinger S and Elad Y. Springer, Cham, Switzerland, pp. 189-216 (2016).
- 31 Fillinger S, Leroux P, Auclair C, Barreau C, Al Hajj C and Debieu D, Genetic analysis of fenhexamid-resistant field Isolates of the phytopathogenic fungus *Botrytis cinerea*. *Antimicrob Agents Chemother* **52**:3933-3940 (2008).
- 32 Harper LA, Derbyshire MC and Lopez-Ruiz FJ, Identification and characterization of *Botrytis medusae*, a novel cryptic species causing grey mould on wine grapes in Australia. *Plant Pathol* **68**:939-953 (2019).

- 33 Mair WJ, Deng W, Mullins JGL, West S, Wang P, Besharat N, et al., Demethylase inhibitor fungicide resistance in *Pyrenophora teres f. sp. teres* associated with target site modification and inducible overexpression of *cyp51*. *Front Microbiol* **7** (2016).
- 34 Stammler G and Speakman J, Microtiter method to test the sensitivity of *Botrytis cinerea* to boscalid. *J Phytopathol* **154**:508-510 (2006).
- 35 Oshima M, Banno S, Okada K, Takeuchi T, Kimura M, Ichiishi A, et al., Survey of mutations of a histidine kinase gene *bcos1* in dicarboximide-resistant field isolates of *Botrytis cinerea*. *J Gen Plant Pathol* **72**:65-73 (2006).
- 36 Mair W, Lopez-Ruiz F, Stammler G, Clark W, Burnett F, Hollomon D, et al., Proposal for a unified nomenclature for target-site mutations associated with resistance to fungicides. *Pest Manage Sci* **72**:1449-1459 (2016).
- 37 Toffolatti SL, Russo G, Bezza D, Bianco PA, Massi F, Marcianò D, et al., Characterization of fungicide sensitivity profiles of *Botrytis cinerea* populations sampled in Lombardy (Northern Italy) and implications for resistance management. *Pest Manage Sci* **76**:2198-2207 (2020).
- 38 Banno S, Yamashita K, Fukumori F, Okada K, Uekusa H, Takagaki M, et al., Characterization of QoI resistance in *Botrytis cinerea* and identification of two types of mitochondrial cytochrome b gene. *Plant Pathol* **58**:120-129 (2009).
- 39 Lu XH, Jiao XL, Hao JJ, Chen AJ and Gao WW, Characterization of resistance to multiple fungicides in *Botrytis cinerea* populations from Asian ginseng in northeastern China. *Eur J Plant Pathol* **144**:467-476 (2016).
- 40 Yin D, Chen X, Hamada MS, Yu M, Yin Y and Ma Z, Multiple resistance to QoIs and other classes of fungicides in *Botrytis cinerea* populations from strawberry in Zhejiang province, China. *Eur J Plant Pathol* **141**:169-177 (2015).
- 41 Billard A, Fillinger S, Leroux P, Bach J, Lanen C, Lachaise H, et al., Fenhexamid resistance in the *Botrytis* species complex, responsible for grey mould disease, in *Fungicides: Beneficial and Harmful Aspects*, ed. by Thajuddin N. Intech, Rijeka, Croatia, pp. 61-78 (2011).
- 42 Saito S, Cadle-Davidson L and Wilcox WF, Selection, fitness, and control of grape isolates of *Botrytis cinerea* variably sensitive to fenhexamid. *Plant Dis* **98**:233-240 (2013).
- 43 Zhao H, Kim YK, Huang L and Xiao CL, Resistance to thiabendazole and baseline sensitivity to fludioxonil and pyrimethanil in *Botrytis cinerea* populations from apple and pear in Washington State. *Postharvest Biol Technol* **56**:12-18 (2010).
- 44 Ziogas BN, Markoglou AN and Spyropoulou V, Effect of phenylpyrrole-resistance mutations on ecological fitness of *Botrytis cinerea* and their genetical basis in *Ustilago maydis*. *Eur J Plant Pathol* **113**:83 (2005).
- 45 Beever RE and Brien HMR, A survey of resistance to the dicarboximide fungicides in *Botrytis cinerea*. *N Z J Agric Res* **26**:391-400 (1983).
- 46 Cui W, Beever RE, Parkes SL and Templeton MD, Evolution of an osmosensing histidine kinase in field strains of *Botryotinia fuckeliana* (*Botrytis cinerea*) in response to dicarboximide fungicide usage. *Phytopathology* **94**:1129-1135 (2004).
- 47 Grabke A, Fernández-Ortuño D, Amiri A, Li X, Peres NA, Smith P, et al., Characterization of iprodione resistance in *Botrytis cinerea* from strawberry and blackberry. *Phytopathology* **104**:396-402 (2014).
- 48 Bardas GA, Myresiotis CK and Karaoglanidis GS, Stability and fitness of anilinopyrimidine-resistant strains of *Botrytis cinerea*. *Phytopathology* **98**:443-450 (2008).

- 49 Fernández-Ortuño D, Chen F and Schnabel G, Resistance to Cyprodinil and Lack of Fludioxonil Resistance in *Botrytis cinerea* Isolates from Strawberry in North and South Carolina. *Plant Dis* **97**:81-85 (2013).
- 50 Leroux P, Gredt M, Leroch M and Walker A-S, Exploring mechanisms of resistance to respiratory inhibitors in field strains of *Botrytis cinerea*, the causal agent of gray mold. *Appl Environ Microbiol* **76**:6615-6630 (2010).
- 51 Gullino ML, Bertetti D, Monchiero M and Garibaldi A, Sensitivity to anilinopyrimidines and phenylpyrroles in *Botrytis cinerea* in north-Italian vineyards. *Phytopathol Mediterr* **39**:433-446 (2000).
- 52 Li X, Fernandez-Ortuno D, Chen S, Grabke A, Luo C-X, Bridges WC, et al., Location-specific fungicide resistance profiles and evidence for stepwise accumulation of resistance in *Botrytis cinerea*. *Plant dis* **98**:1066-1074 (2014).
- 53 Hu M-J, Cox KD and Schnabel G, Resistance to increasing chemical classes of fungicides by virtue of “selection by association” in *Botrytis cinerea*. *Phytopathology* **106**:1513-1520 (2016).
- 54 Weber RW and Entrop A-P, Multiple fungicide resistance in *Botrytis*: a growing problem in German soft-fruit production, in *Fungicides: Beneficial and Harmful Aspects*, ed. by Thajuddin N. InTech, Rijeka, Croatia, pp. 45-60 (2011).
- 55 Ishii H, Fountaine J, Chung W-H, Kansako M, Nishimura K, Takahashi K, et al., Characterisation of QoI-resistant field isolates of *Botrytis cinerea* from citrus and strawberry. *Pest Manage Sci* **65**:916-922 (2009).
- 56 Jiang J, Ding L, Michailides TJ, Li H and Ma Z, Molecular characterization of field azoxystrobin-resistant isolates of *Botrytis cinerea*. *Pestic Biochem Physiol* **93**:72-76 (2009).
- 57 Asadollahi M, Szojka A, Fekete E, Karaffa L, Takács F, Flippi M, et al., Resistance to QoI fungicide and cytochrome b diversity in the Hungarian *Botrytis cinerea* population. *J Agric Sci Technol* **15**:397-408 (2013).
- 58 Grasso V, Palermo S, Sierotzki H, Garibaldi A and Gisi U, Cytochrome b gene structure and consequences for resistance to Qo inhibitor fungicides in plant pathogens. *Pest Manage Sci* **62**:465-472 (2006).
- 59 Vallières C, Trouillard M, Dujardin G and Meunier B, Deleterious effect of the Q(o) inhibitor compound resistance-conferring mutation G143A in the intron-containing cytochrome b gene and mechanisms for bypassing it. *Appl Environ Microbiol* **77**:2088-2093 (2011).
- 60 Stammler G, Brix HD, Navé B, Gold R, Schoefl U, Dehne HW, et al., Studies on the biological performance of boscalid and its mode of action, in *Modern fungicides and antifungal compounds V*. Deutsche Phytomedizinische Gesellschaft, Braunschweig, Germany, pp. 45-51 (2008).
- 61 Albertini C and Leroux P, A *Botrytis cinerea* putative 3-keto reductase gene (ERG27) that is homologous to the mammalian 17 $\beta$ -hydroxysteroid dehydrogenase type 7 gene (17 $\beta$ -HSD7). *Eur J Plant Pathol* **110**:723-733 (2004).
- 62 Grabke A, Fernández-Ortuño D and Schnabel G, Fenhexamid resistance in *Botrytis cinerea* from strawberry fields in the Carolinas is associated with four target gene mutations. *Plant Dis* **97**:271-276 (2012).
- 63 Esterio M, Ramos C, Walker A-S, Fillinger S, Leroux P and Auger J, Phenotypic and genetic characterization of *B. cinerea* Chilean isolates of different levels of fenhexamid sensitivity. *Phytopathol Mediterr* **50**:414-420 (2011).



- 64 Ma Z, Yan L, Luo Y and Michailides TJ, Sequence variation in the two-component histidine kinase gene of *Botrytis cinerea* associated with resistance to dicarboximide fungicides. *Pestic Biochem Physiol* **88**:300-306 (2007).
- 65 Oshima M, Fujimura M, Banno S, Hashimoto C, Motoyama T, Ichiishi A, et al., A point mutation in the two-component histidine kinase bcOS-1 gene confers dicarboximide resistance in field isolates of *Botrytis cinerea*. *Phytopathology* **92**:75-80 (2002).

## Tables

**Table 1.** Results summary of the microtiter phenotyping of 53 *B. cinerea* isolates.

|                                         | Azoxystrobin                | Boscalid        | Fenhexamid   | Iprodione     | Pyrimethanil  | Tebuconazole |              |
|-----------------------------------------|-----------------------------|-----------------|--------------|---------------|---------------|--------------|--------------|
| EC <sub>50</sub> (µg mL <sup>-1</sup> ) | Sensitive range             | 0.04 - 0.37     | 0.03 - 0.10  | 0.05 - 0.22   | 0.75 - 2.05   | 0.09 - 0.22  | 0.21 - 0.72  |
|                                         | Sensitive mean              | 0.12 ± 0.010    | 0.05 ± 0.002 | 0.10 ± 0.006  | 1.20 ± 0.039  | 0.14 ± 0.004 | 0.43 ± 0.015 |
|                                         | Resistant range             | >50             | 2.74 - 2.90  | 25.47 - 27.33 | 5.16 - >50    | 0.75 - 5.90  | 1.06 - 1.80  |
|                                         | Resistant mean <sup>a</sup> | 171.26 ± 16.264 | 2.82 ± 0.076 | 26.19 ± 0.578 | 21.80 ± 4.901 | 2.99 ± 0.805 | 1.43 ± 0.372 |
|                                         | LR range                    | -               | -            | -             | -             | -            | 1.06 - 1.80  |
|                                         | MR range                    | -               | -            | -             | 5.16 - 11.94  | 0.75 - 2.27  | -            |
|                                         | HR or R range               | >50             | 2.74 - 2.90  | 25.46 - 27.33 | >16.78        | 4.66 - 5.90  | -            |
| no. of isolates                         | Sensitive                   | 48              | 51           | 50            | 43            | 46           | 51           |
|                                         | Resistant                   | 5               | 2            | 3             | 9             | 7            | 2            |
| RF range                                | >413                        | 55 - 58         | 255 - 273    | 4.3 - >42     | 5 - 42        | 2.5 - 4.2    |              |
| Resistance frequency (%)                | 9.3                         | 3.7             | 5.7          | 17            | 13.2          | 3.8          |              |

<sup>a</sup>: Significant differences were found between the resistant and sensitive populations according to independent samples t-test ( $P = 0.05$ ) or Mann-Whitney U-test ( $P = 0.05$ ).

**Table 2.** Frequency of phenotypes characterised across six Australian states.

|                                   | WA         | SA        | TAS       | VIC       | NSW       | QLD      | Total (%)  |
|-----------------------------------|------------|-----------|-----------|-----------|-----------|----------|------------|
| Isolates tested                   | 364        | 95        | 21        | 121       | 103       | 20       | 725        |
| Vineyards sampled                 | 38         | 13        | 1         | 11        | 13        | 1        | 77         |
| Total sensitive                   | 308 (84.6) | 71 (74.7) | 8 (38.2)  | 76 (62.8) | 97 (94.2) | 20 (100) | 581 (80.1) |
| Resistance phenotype <sup>a</sup> |            |           |           |           |           |          |            |
| Azo                               | 1          | 1         | 0         | 0         | 1         | 0        | 3 (0.4)    |
| Bos                               | 2          | 0         | 1         | 0         | 0         | 0        | 3 (0.4)    |
| Flu                               | 11         | 1         | 0         | 10        | 0         | 0        | 22 (3)     |
| lpr                               | 14         | 2         | 9         | 9         | 1         | 0        | 35 (4.8)   |
| Pyr                               | 1          | 0         | 0         | 5         | 1         | 0        | 7 (1)      |
| Teb                               | 5          | 4         | 0         | 1         | 1         | 0        | 11 (1.5)   |
| Azo Bos                           | 0          | 2         | 0         | 0         | 0         | 0        | 2 (0.3)    |
| Azo Flu                           | 0          | 1         | 0         | 0         | 0         | 0        | 1 (0.1)    |
| Azo lpr                           | 2          | 0         | 0         | 0         | 0         | 0        | 2 (0.3)    |
| Azo Pyr                           | 2          | 0         | 0         | 1         | 0         | 0        | 3 (0.4)    |
| Flu lpr                           | 1          | 1         | 0         | 1         | 0         | 0        | 3 (0.4)    |
| Flu Pyr                           | 0          | 0         | 0         | 1         | 0         | 0        | 1 (0.1)    |
| Flu Teb                           | 1          | 1         | 0         | 0         | 0         | 0        | 2 (0.3)    |
| lpr Pyr                           | 2          | 0         | 0         | 1         | 0         | 0        | 3 (0.4)    |
| lpr Teb                           | 0          | 0         | 3         | 0         | 0         | 0        | 3 (0.4)    |
| Pyr Teb                           | 0          | 0         | 0         | 1         | 0         | 0        | 1 (0.1)    |
| Azo lpr Pyr                       | 1          | 1         | 0         | 0         | 0         | 0        | 2 (0.3)    |
| Azo Bos Pyr                       | 3          | 0         | 0         | 0         | 0         | 0        | 3 (0.4)    |
| Azo Fen Pyr                       | 0          | 0         | 0         | 0         | 1         | 0        | 1 (0.1)    |
| Azo Flu lpr                       | 0          | 1         | 0         | 0         | 0         | 0        | 1 (0.1)    |
| Fen lpr Pyr                       | 0          | 0         | 0         | 5         | 0         | 0        | 5 (0.7)    |
| Flu lpr Pyr                       | 2          | 0         | 0         | 2         | 0         | 0        | 4 (0.6)    |
| Azo Bos lpr Pyr                   | 7          | 2         | 0         | 1         | 0         | 0        | 10 (1.4)   |
| Azo Fen lpr Pyr                   | 0          | 2         | 0         | 1         | 0         | 0        | 3 (0.4)    |
| Azo Flu lpr Pyr                   | 0          | 3         | 0         | 0         | 0         | 0        | 3 (0.4)    |
| Bos Flu lpr Pyr                   | 0          | 1         | 0         | 0         | 0         | 0        | 1 (0.1)    |
| Fen Flu lpr Pyr                   | 0          | 0         | 0         | 4         | 0         | 0        | 4 (0.6)    |
| Flu lpr Pyr Teb                   | 1          | 0         | 0         | 2         | 0         | 0        | 3 (0.4)    |
| Azo Bos Fen lpr Pyr               | 0          | 1         | 0         | 0         | 0         | 0        | 1 (0.1)    |
| Azo Fen lpr Pyr Teb               | 0          | 0         | 0         | 0         | 1         | 0        | 1 (0.1)    |
| Total resistant (%)               | 56 (15.4)  | 24 (25.3) | 13 (61.9) | 45 (37.2) | 6 (5.8)   | 0        | 144 (19.8) |

<sup>a</sup>: Azo = azoxystrobin, Bos = boscalid, Fen = fenhexamid, lpr = iprodione, Pyr = pyrimethanil, Teb = tebuconazole

**Table 3.** Frequency of mutations associated with resistance identified in this study.

| Target gene  | Amino acid change <sup>a</sup> | Nucleotide change <sup>b</sup>           | Phenotype <sup>c</sup> | No. of isolates | Reference                                                        |
|--------------|--------------------------------|------------------------------------------|------------------------|-----------------|------------------------------------------------------------------|
| <i>CytB</i>  | G143A                          | G3628C                                   | R                      | 5               | Banno et al. 2009                                                |
| <i>SdhB</i>  | H272R                          | A871G                                    | R                      | 10              | Stammler et al. 2008                                             |
|              | H272Y                          | C870T                                    | ND                     | 1               | Stammler et al. 2008                                             |
| <i>Erg27</i> | F412S                          | T1314C                                   | R                      | 3               | Fillinger et al. 2008                                            |
|              | I365S                          | T1214G                                   | MR                     | 5               | Oshima et al. 2002                                               |
|              | I365N/R/S                      | -                                        | ND                     | 18              | Oshima et al. 2002                                               |
| <i>Bos1</i>  | I365S + D757N                  | T1214G + G2592A                          | HR                     | 1               | Lu et al. 2016                                                   |
|              | Q369P + N373S                  | A1226C + A1238G                          | HR                     | 4               | Cui et al. 2004, Oshima et al. 2006                              |
|              | Q369H/P                        | -                                        | ND                     | 11              | Cui et al. 2004                                                  |
| <i>Pos5</i>  | V273I                          | G928A                                    | MR                     | 2               | Mosbach et al. 2017                                              |
|              | V273L                          | G928C                                    | MR                     | 1               | This study                                                       |
|              | P319A                          | C1066G                                   | HR                     | 2               | Mosbach et al. 2017                                              |
|              | L412F                          | G1347T                                   | HR                     | 3               | Mosbach et al. 2017                                              |
|              | L412V                          | T1345G                                   | HR                     | 2               | Mosbach et al. 2017                                              |
| <i>Mdl1</i>  | T66A                           | G196A                                    | MR, HR                 | 3               | Mosbach et al. 2017                                              |
|              | Δ6bp + D354Y                   | Δ6bp (nt 67-84) <sup>†</sup><br>+ G1743T | R                      | 1               | Leroch et al. 2013, Fernández-Ortuño et al. 2014, Li et al. 2014 |
| <i>Mrr1</i>  | S611N                          | G2521A                                   | R                      | 1               | This study                                                       |
|              | D616G                          | A2536G                                   | MR                     | 1               | This study                                                       |
| <i>Cyp51</i> | P347S                          | C1153T                                   | LR                     | 1               | This study                                                       |

<sup>a</sup>: I365N/R/S and Q369P/H indicate CAPS analysis.

<sup>b</sup>: This study. <sup>†</sup>exact position undetermined

<sup>c</sup>: LR = low resistance, MR = medium resistance, HR = high resistance, R = resistance. ND = not determined

**Table 4.** Methodologies and results for EC<sub>50</sub> and frequency data from wine grape, table grape and non-grape reports for comparative purposes

| Fungicide                  | Reference                    | Host        | Country of origin      | EC <sub>50</sub> phenotyping method <sup>d</sup> | Sensitive phenotypic data (µg mL <sup>-1</sup> ) <sup>b</sup> | Resistant phenotypic data (µg mL <sup>-1</sup> ) <sup>c</sup> | Frequency screening method <sup>d</sup> | Total resistance frequency (%) <sup>e</sup> |
|----------------------------|------------------------------|-------------|------------------------|--------------------------------------------------|---------------------------------------------------------------|---------------------------------------------------------------|-----------------------------------------|---------------------------------------------|
| Azoxystrobin               | This study                   | wine grape  | Australia              | MIC                                              | 0.04 - 0.37 <sup>†</sup><br>(Table 1)                         | 171 <sup>†</sup> (Table 1)                                    | AMG                                     | 5 (Fig. 2)                                  |
|                            | Banno et al. 2009            | non-grape   | Japan                  | AMG                                              | 0.07 - 0.64 <sup>†</sup>                                      | 19.3 - 21 <sup>†</sup>                                        | AMG                                     | 3                                           |
|                            | Leroux et al. 2010           | wine grape  | France, Germany        | AGT                                              | 0.33 <sup>†</sup>                                             | >75 <sup>††</sup>                                             | AGT                                     | 7                                           |
|                            | Weber and Hahn 2011          | non-grape   | Germany                | AGT                                              | 0.04 - 0.12 <sup>†</sup>                                      | >100 <sup>†</sup>                                             | ND                                      | ND                                          |
|                            | Yin et al. 2015              | non-grape   | China                  | AMG                                              | 0.02 - 2.5 <sup>†</sup>                                       | 6.1 - 500 <sup>†</sup>                                        | AMG                                     | 66                                          |
|                            | Lu et al. 2016               | non-grape   | China                  | ND                                               | ND                                                            | ND                                                            | AMG                                     | 31.6                                        |
| Boscalid                   | This study                   | wine grape  | Australia              | MIC                                              | 0.03 - 0.1<br>(Table 1)                                       | 2.74 - 2.9 <sup>†</sup><br>(Table 1)                          | AMG                                     | 2.8 (Fig. 2)                                |
|                            | Stammler and Speakman 2006   | wine grape  | Various (n=13)         | MIC                                              | 0.01 - 0.21 <sup>†</sup>                                      | ND                                                            | ND                                      | ND                                          |
|                            | Alberoni et al. 2011         | wine grape  | Italy                  | MIC, AMG                                         | 0.03 - 0.87 <sup>†</sup>                                      | ND                                                            | ND                                      | ND                                          |
|                            | Leroch et al. 2011           | wine grape  | Germany                | ND                                               | ND                                                            | ND                                                            | MIC                                     | 2, 8.3, 12.2, 26.7                          |
|                            | Campia et al. 2017           | wine grape  | Italy                  | MIC                                              | ND                                                            | ND                                                            | MIC                                     | 1                                           |
|                            | Toffolatti et al. 2020       | wine grape  | Italy                  | MIC                                              | <1.2 <sup>§</sup>                                             | >1.2 <sup>§</sup>                                             | MIC                                     | 3                                           |
| Fenhexamid                 | This study                   | wine grape  | Australia              | MIC                                              | 0.05 - 0.22 <sup>†</sup><br>(Table 1)                         | 25.46 - 27.33 <sup>†</sup><br>(Table 1)                       | AMG                                     | 2.1 (Fig. 2)                                |
|                            | Leroux et al. 1999           | wine grape  | France                 | AMG, AGT, AGE                                    | 0.008 - 0.06 <sup>†</sup>                                     | 0.06 - ≥5 <sup>†</sup>                                        | ND                                      | ND                                          |
|                            | Albertini and Leroux 2004    | wine grape  | France, Germany, Japan | AMG                                              | <0.4 <sup>††</sup>                                            | >0.4 <sup>§</sup>                                             | ND                                      | ND                                          |
|                            | Fillinger et al. 2008        | wine grape  | France, Germany        | AMG, AGE                                         | <0.1 <sup>§</sup>                                             | >5 <sup>§</sup>                                               | ND                                      | ND                                          |
|                            | Latorre and Torres 2012      | table grape | Chile                  | AMG                                              | <0.05 - 0.2 <sup>†</sup>                                      | 0.2 - >2 <sup>†</sup>                                         | AMG                                     | 27.1                                        |
|                            | Beresford et al. 2017        | wine grape  | New Zealand            | AMG                                              | 0.63 <sup>†</sup>                                             | ND                                                            | AMG                                     | 0                                           |
| Toffolatti et al. 2020     | wine grape                   | Italy       | MIC                    | <0.5 <sup>§</sup>                                | 0.55 - 1.15 <sup>†</sup>                                      | MIC                                                           | 0.1                                     |                                             |
| Fludioxonil                | This study                   | wine grape  | Australia              | MIV                                              | 0.09 - 0.17<br>(Table S1)                                     | 0.93 (Table S1)                                               | AMG                                     | 6.2 (Fig. 2)                                |
|                            | Weber and Hahn 2011          | non-grape   | Germany                | AGT                                              | 0.01 - 0.178 <sup>†</sup>                                     | 0.30 - 0.65 <sup>†</sup>                                      | ND                                      | ND                                          |
|                            | Latorre and Torres 2012      | table grape | Chile                  | AMG                                              | <0.05 - 0.97 <sup>†</sup>                                     | 1 - >5 <sup>†</sup>                                           | AMG                                     | 44.8                                        |
|                            | Fernández-Ortuño et al. 2014 | non-grape   | U.S.A                  | AGE                                              | 0.02 - 0.05 <sup>†</sup>                                      | 0.33 - 3.1 <sup>†</sup>                                       | ND                                      | ND                                          |
|                            | Toffolatti et al. 2020       | wine grape  | Italy                  | MIC                                              | <0.1 <sup>§</sup>                                             | 0.2 - 8 <sup>†</sup>                                          | MIC                                     | 5                                           |
| Iprodione                  | This study                   | wine grape  | Australia              | MIC                                              | 0.75 - 2.05 <sup>†</sup><br>(Table 1)                         | 5.16 - >50*<br>(Table 1)                                      | AMG                                     | 11.6 (Fig. 2)                               |
|                            | Leroux et al. 1999           | wine grape  | France                 | AMG, AGT, AGE                                    | 0.6 - 2.5 <sup>†</sup>                                        | 3 - >25 <sup>†</sup>                                          | ND                                      | ND                                          |
|                            | Leroch et al. 2011           | wine grape  | Germany                | ND                                               | ND                                                            | ND                                                            | MIC                                     | 1.1 - 6.1                                   |
| Pyrimethanil or cyprodinil | This study                   | wine grape  | Australia              | MIC                                              | 0.09 - 0.22 <sup>†</sup><br>(Table 1)                         | 0.75 - 5.90 <sup>†</sup><br>(Table 1)                         | AMG                                     | 7.7 (Fig. 2)                                |
|                            | Gulliano et al. 2000         | wine grape  | Italy                  | AMG                                              | <0.1 <sup>§</sup>                                             | 0.2 - 20 <sup>†</sup>                                         | ND                                      | ND                                          |
|                            | Latorre et al. 2002          | table grape | Chile                  | AMG                                              | <0.1 - 0.23 <sup>†</sup>                                      | 5.66 - >10 <sup>†</sup>                                       | AMG                                     | 38.5                                        |
|                            | Sergreeva et al. 2002        | wine grape  | Australia              | AMG                                              | ND                                                            | 1.5 - 2 <sup>†</sup>                                          | AMG                                     | 0 - 12                                      |
|                            | Latorre and Torres 2012      | table grape | Chile                  | AMG                                              | <0.05 - 0.94 <sup>†</sup>                                     | 1.1 - >5 <sup>†</sup>                                         | AMG                                     | 62.7                                        |
|                            | Beresford et al. 2017        | wine grape  | New Zealand            | AMG                                              | <1 <sup>§</sup>                                               | 1 - >10 <sup>†</sup>                                          | AMG                                     | 28                                          |
|                            | Campia et al. 2017           | wine grape  | Italy                  | MIC                                              | ND                                                            | ND                                                            | microtiter                              | 3.4                                         |
|                            | Avenot et al. 2018           | wine grape  | U.S.A                  | AMG                                              | <1 <sup>§</sup>                                               | >1 <sup>§</sup>                                               | AMG                                     | 17                                          |
| Toffolatti et al. 2020     | wine grape                   | Italy       | MIC                    | <3.2 <sup>§</sup>                                | >3.2 <sup>§</sup>                                             | MIC                                                           | 4%                                      |                                             |
| Tebuconazole               | This study                   | wine grape  | Australia              | MIC                                              | 0.21 - 0.72 <sup>†</sup><br>(Table 1)                         | 1.06 - 1.8 <sup>†</sup><br>(Table 1)                          | AMG                                     | 2.9 (Fig. 2)                                |
|                            | Chapeland et al. 1999        | wine grape  | France                 | AGT                                              | 0.2 - 0.4 <sup>†</sup>                                        | 1.5 - 2.0 <sup>†</sup>                                        | ND                                      | ND                                          |
|                            | Leroux et al. 1999           | wine grape  | France                 | AGT                                              | 0.15 - 0.5 <sup>†</sup>                                       | 1.0 - 2.0 <sup>†</sup>                                        | ND                                      | ND                                          |

a: MIC = microtiter, AMG = agar - mycelial growth, AGT = agar – germ tube elongation, AGE = agar - germination

<sup>b</sup>: † = sensitive EC<sub>50</sub> range, ‡ = sensitive EC<sub>50</sub> mean, § = sensitive EC<sub>50</sub> value, †† = DC (discriminatory concentration), ND = not determined

<sup>c</sup>: † = resistant EC<sub>50</sub> range, ‡ = resistant EC<sub>50</sub> mean, § = resistant EC<sub>50</sub> value, RF = ¶, †† = DC (discriminatory concentration), ND = not determined

<sup>d</sup>: MIC = microtiter, AMG = agar - mycelial growth, AGT = agar – germ tube elongation

<sup>e</sup>: ND = not determined

## Figure legends

**Figure 1.** Distribution of the screened population (n = 725) across various Australian wine growing regions. Modified from “Outline map of Australia” (<https://ecat.ga.gov.au/geonetwork/srv/eng/catalog.search#/metadata/61754>) by Geoscience Australia, Canberra, used under CC BY 4.0.

**Figure 2.** EC<sub>50</sub> distribution of 53 isolates phenotyped in the microtiter assay against azoxystrobin (A), boscalid (B), fenhexamid (C), iprodione (D), pyrimethanil (E), and tebuconazole (F). LR, MR, HR and R indicate isolates designated as exhibiting low resistance, medium resistance, high resistance, or resistance, respectively. \*indicates significant difference between the means of the sensitive and resistant populations according to an independent samples t-test ( $P = 0.05$ ) or Mann-Whitney U-test ( $P = 0.05$ ).

**Figure 3.** Frequency (%) of resistant isolates in the population (n=725) on a per fungicide basis. Azo = azoxystrobin resistance, Bos = boscalid resistance, Fen = fenhexamid resistance, Pyr = pyrimethanil resistance, Ipr = iprodione resistance, teb = tebuconazole resistance. Percentage for each fungicide is shown above each column. These results do not consider resistance to more than one MOA.

**Figure 4.** Number of resistant isolates in each state on a per fungicide basis. A = Western Australia, B = South Australia, C = Victoria, D = New South Wales. Tasmania and Queensland were omitted due to small sample size ( $\leq 21$ ). Azo = azoxystrobin resistance, Bos = boscalid resistance, Fen = fenhexamid resistance, Pyr = pyrimethanil resistance, Ipr = iprodione resistance, Teb = tebuconazole resistance.

**Figure 5.** Frequency (%) of vineyards with no resistance and with at least one isolate resistant to one to five modes of action (MOAs). Percentage for each grouping is shown above each column.

**Figure 6.** Amino acid sequence alignment of fungicide target genes; *CytB* (azoxystrobin), *SdhB* (boscalid), *Erg27* (fenhexamid), *Bos1* (iprodione), *Pos5* (pyrimethanil), *Mdl1* (pyrimethanil), *Cyp51* (tebuconazole), for three sensitive comparative isolates and all resistant isolates characterised in the 53 isolate microtiter assay screen. For each target gene, isolates are ordered from most sensitive to the least sensitive in a descending order. LR, MR, HR and R indicate isolates designated as exhibiting low resistance, medium resistance, high resistance, or resistance, respectively. Black boxes represent non-synonymous changes found when compared to the reference sequence. The *CytB* G143 intron is underlined in Bc-385. † = isolates with novel genotypes.

**Figure 7.** Expression analysis of *AtrB* in the sensitive comparative strain Bc-385 and resistant isolates Bc-128, Bc-130, Bc-279, Bc-287 and Bc-391. Values indicate expression levels relative to the comparative strain Bc-385 without fungicide treatment. Bc-385 untreated expression was



normalised to 1. \*indicates significant difference compared to Bc-385 according to an independent samples t-test ( $P = 0.05$ ). flu = fludioxonil phenotype, teb = tebuconazole phenotype. S, LR, MR, and R indicate isolates designated as sensitive or exhibiting low resistance, medium resistance, or resistance, respectively.

**Figure 8.** Non-synonymous changes (vertical lines) found in *Mrr1* amino acid sequences of the sensitive isolate Bc-385 and MDR1 candidate isolates; Bc-130, Bc-287, Bc-279, Bc-128 and Bc-391. All non-synonymous changes (vertical lines), insertions (+) and deletions ( $\Delta$ ), are indicated as compared to the reference strain B05.10. All changes unique to each isolate compared to other isolates in this study are labelled. flu = fludioxonil phenotype, S = sensitive, MR = medium resistance, R = resistance.

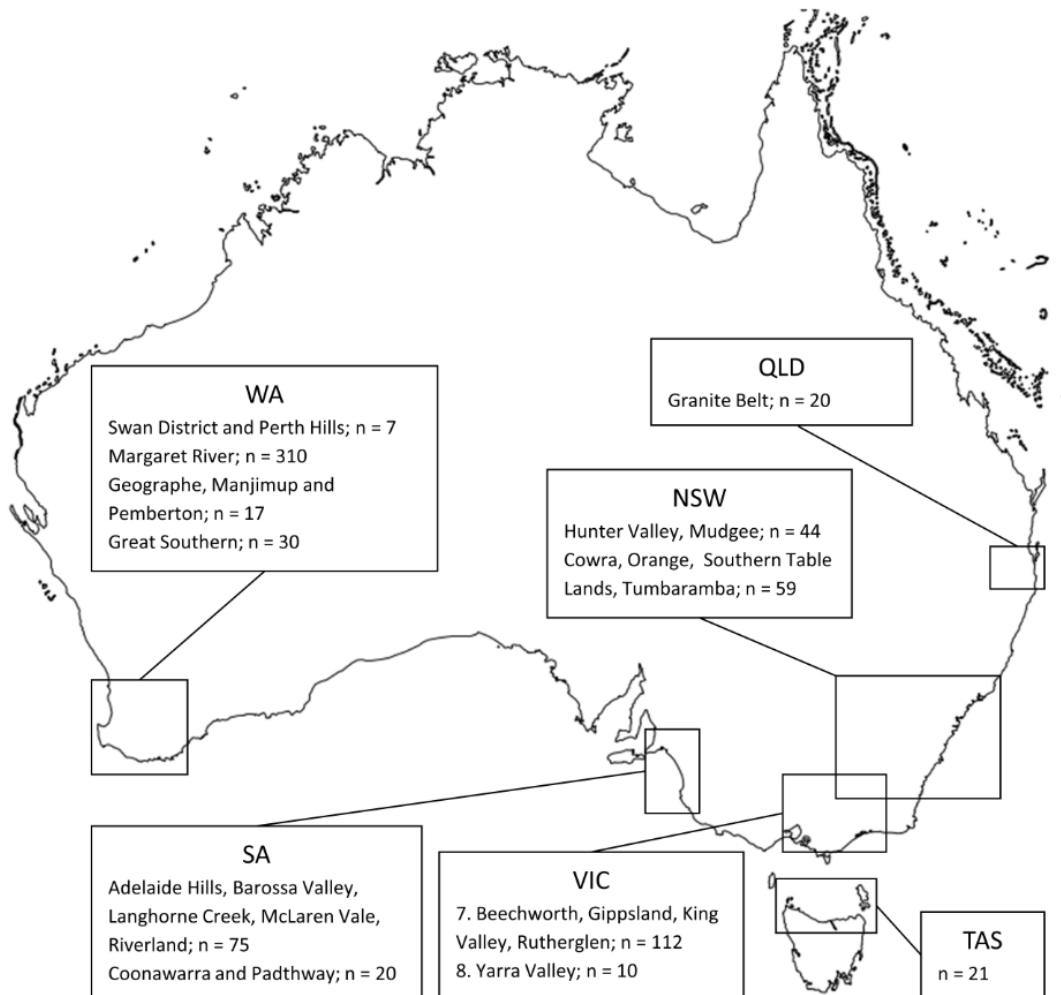

**Figure 1.** Distribution of the screened population (n = 725) across various Australian wine growing regions. Modified from “Outline map of Australia” (<https://ecat.ga.gov.au/geonetwork/srv/eng/catalog.search#/metadata/61754>) by Geoscience Australia, Canberra, used under CC BY 4.0.

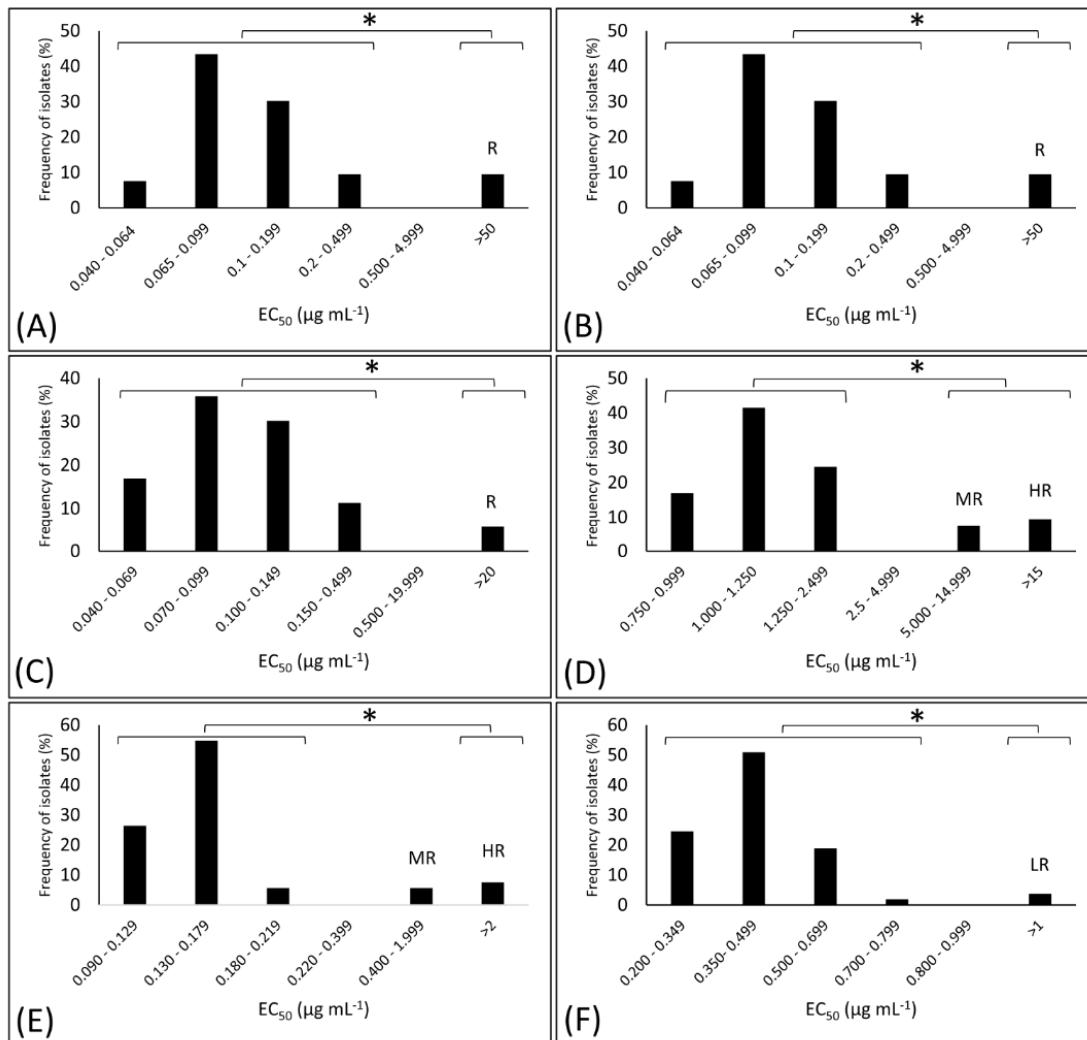

**Figure 2.** EC<sub>50</sub> distribution of 53 isolates phenotyped in the microtiter assay against azoxystrobin (A), boscalid (B), fenhexamid (C), iprodione (D), pyrimethanil (E), and tebuconazole (F). LR, MR, HR and R indicate isolates designated as exhibiting low resistance, medium resistance, high resistance, or resistance, respectively. \*indicates significant difference between the means of the sensitive and

resistant populations according to an independent samples t-test ( $P = 0.05$ ) or Mann-Whitney U-test ( $P = 0.05$ ).

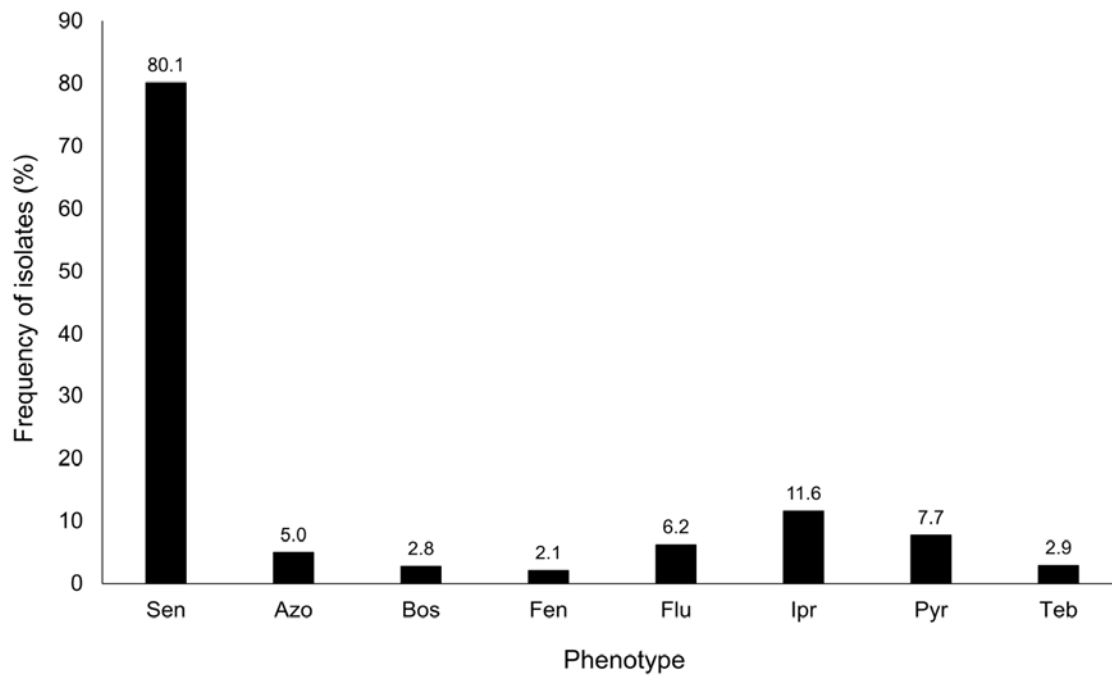

**Figure 3.** Frequency (%) of resistant isolates in the population ( $n=725$ ) on a per fungicide basis. Azo = azoxystrobin resistance, Bos = boscalid resistance, Fen = fenhexamid resistance, Pyr = pyrimethanil resistance, Ipr = iprodione resistance, teb = tebuconazole resistance. Percentage for each fungicide is shown above each column. These results do not consider resistance to more than one MOA.

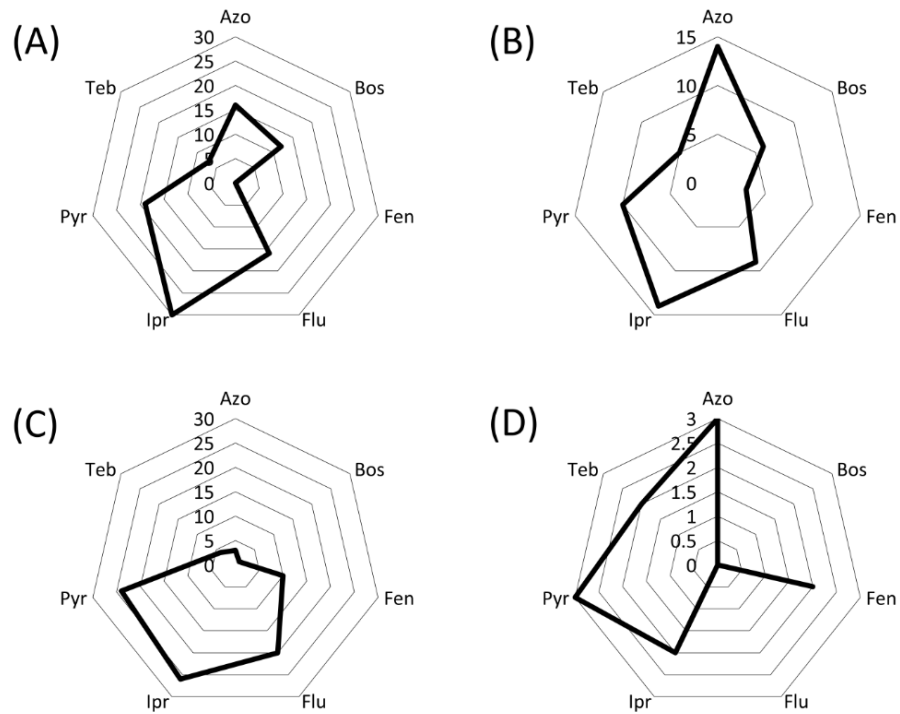

**Figure 4.** Number of resistant isolates in each state on a per fungicide basis. A = Western Australia, B = South Australia, C = Victoria, D = New South Wales. Tasmania and Queensland were omitted due to small sample size ( $\leq 21$ ). Azo = azoxystrobin resistance, Bos = boscalid resistance, Fen = fenhexamid resistance, Pyr = pyrimethanil resistance, Ipr = iprodione resistance, Teb = tebuconazole resistance.

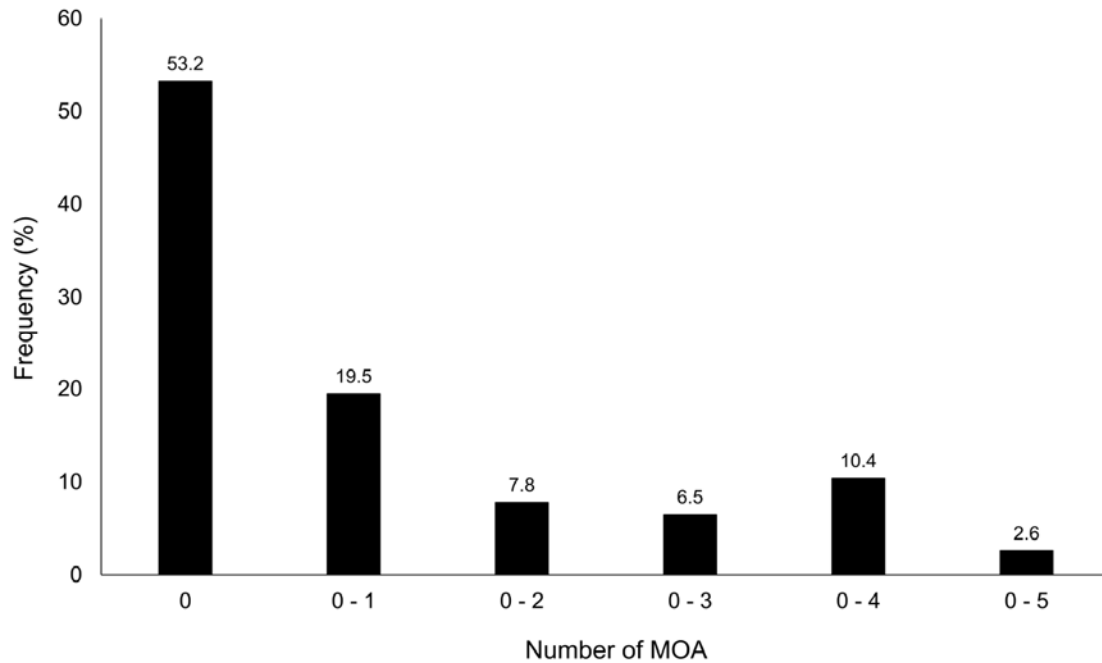

**Figure 5.** Frequency (%) of vineyards with no resistance and with at least one isolate resistant to one to five modes of action (MOAs). Percentage for each grouping is shown above each column.

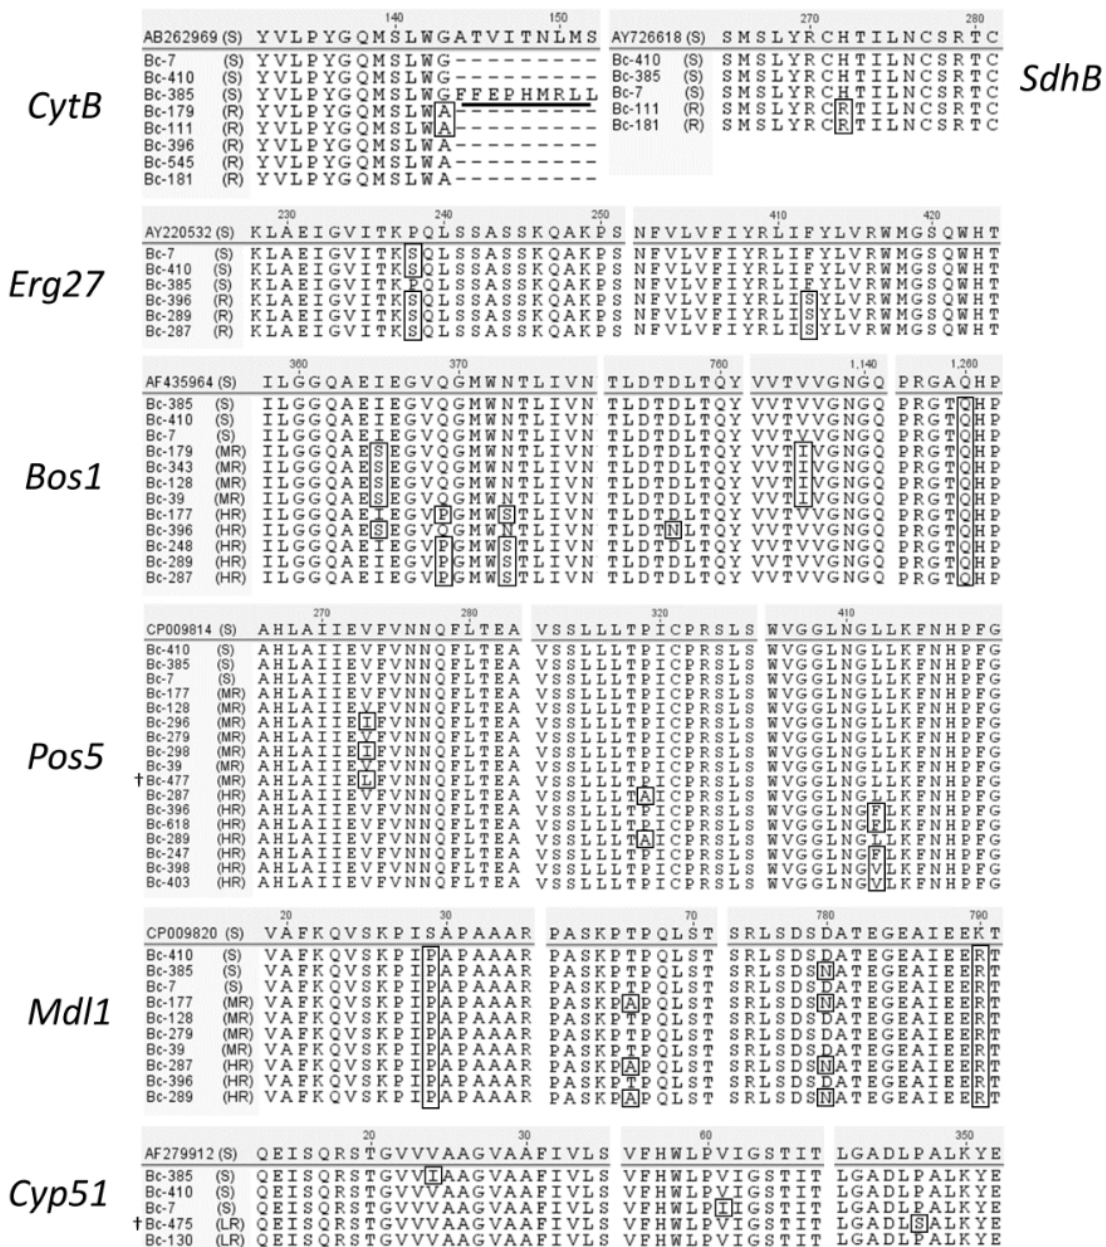

**Figure 6.** Amino acid sequence alignment of fungicide target genes; *CytB* (azoxystrobin), *SdhB* (boscalid), *Erg27* (fenhexamid), *Bos1* (iprodione), *Pos5* (pyrimethanil), *Mdl1* (pyrimethanil), *Cyp51*

(tebuconazole), for three sensitive comparative isolates and all resistant isolates characterised in the 53 isolate microtiter assay screen. For each target gene, isolates are ordered from most sensitive to the least sensitive in a descending order. LR, MR, HR and R indicate isolates designated as exhibiting low resistance, medium resistance, high resistance, or resistance, respectively. Black boxes represent non-synonymous changes found when compared to the reference sequence. The *CytB* G143 intron is underlined in Bc-385. † = isolates with novel genotypes.



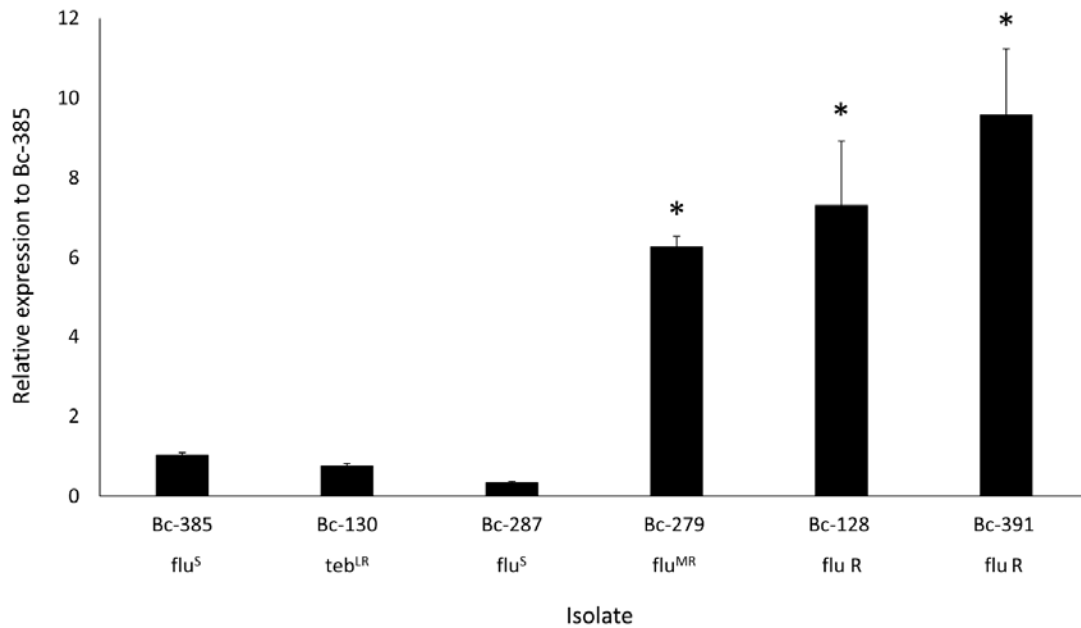

**Figure 7.** Expression analysis of *AtrB* in the sensitive comparative strain Bc-385 and resistant isolates Bc-128, Bc-130, Bc-279, Bc-287 and Bc-391. Values indicate expression levels relative to the comparative strain Bc-385 without fungicide treatment. Bc-385 untreated expression was normalised to 1. \*indicates significant difference compared to Bc-385 according to an independent samples t-test ( $P = 0.05$ ). flu = fludioxonil phenotype, teb = tebuconazole phenotype. S, LR, MR, and R indicate isolates designated as sensitive or exhibiting low resistance, medium resistance, or resistance, respectively.

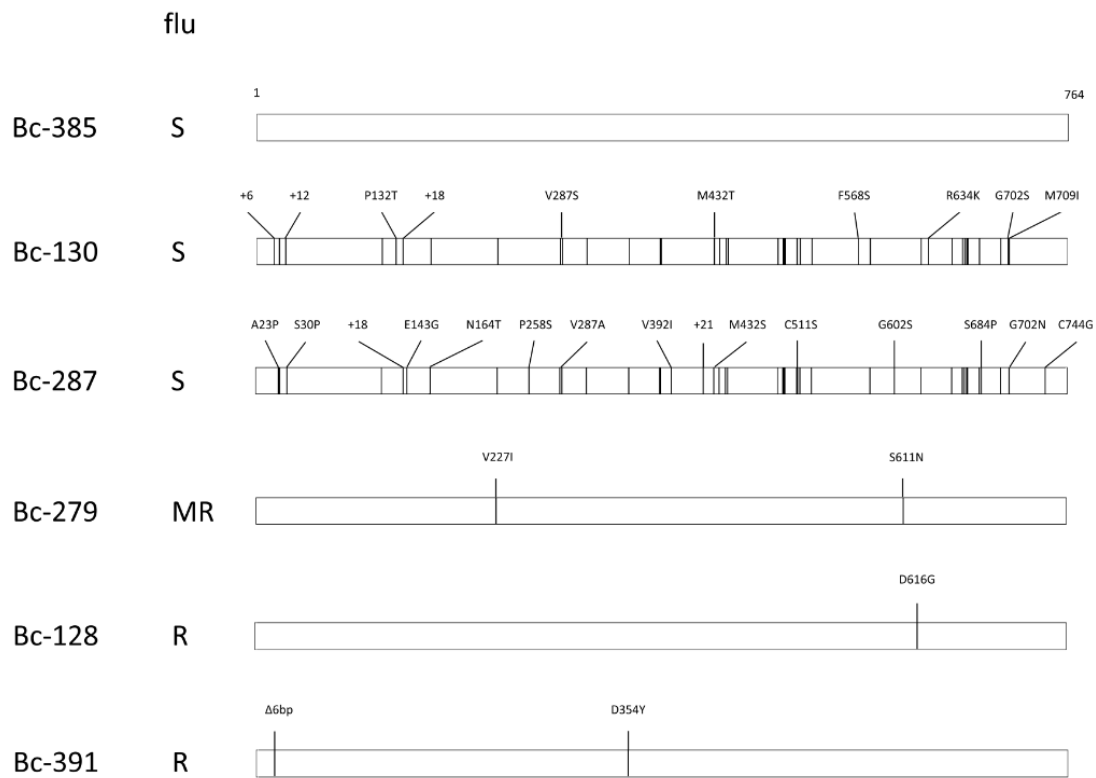

**Figure 8.** Non-synonymous changes (vertical lines) found in *Mrr1* amino acid sequences of the sensitive isolate Bc-385 and MDR1 candidate isolates; Bc-130, Bc-287, Bc-279, Bc-128 and Bc-391. All non-synonymous changes (vertical lines), insertions (+) and deletions ( $\Delta$ ), are indicated as compared to the reference strain B05.10. All changes unique to each isolate compared to other isolates in this study are labelled. flu = fludioxonil phenotype, S = sensitive, MR = medium resistance, R = resistance.
